# Supplementary material for: Organic–inorganic hybrid polyoxometalate and its graphene oxide–Fe3O4nanocomposite, synthesis, characterization and their applications as nanocatalysts for the Knoevenagel condensation and the synthesis of 2,3-dihydroquinazolin-4(1H)-ones
Source: Royal Society of Chemistry journal article supplement (doi:10.1039/c6ra15339a), 2016-01-01
Supplement: c6ra15339a1.pdf [file c6ra15339a1.pdf]

## Supporting Information

**Organic–inorganic hybrid polyoxometalate and its graphene oxide-Fe<sub>3</sub>O<sub>4</sub> nanocomposite, synthesis, characterization and their applications as nanocatalysts for the Knoevenagel condensation and the synthesis of 2,3-dihydroquinazolin-4(1*H*)-ones**

*Roushan Khoshnavazi\*, Liela Bahrami, Forugh Havasi*

*Department of chemistry, University of Kurdistan P.O. Box 66135-416, Sanandaj, Iran*

*E-mail address : [r.khoshnavazi@uok.ac.ir](mailto:r.khoshnavazi@uok.ac.ir) or [khoshnavazi@yahoo.com](mailto:khoshnavazi@yahoo.com)*

**<sup>1</sup>H NMR and <sup>13</sup>C NMR spectra of the catalytic synthesized compounds**

## NMR Spectra of Knoevenagel Products

**2-Benzylidene-malononitrile (table 2, entry 1):** Mp: 82-83 °C [59];  $^1\text{H}$  NMR (400 MHz,  $\text{CDCl}_3$ )  $\delta$  (ppm): 7.1 (t,  $J = 8.0$  Hz, 2H), 7.6 (t,  $J = 8.0$  Hz, 1H), 7.8 (d,  $J = 8.20$  Hz, 2H), 8 (s, 1H);  $^{13}\text{C}$  NMR (100 MHz,  $\text{CDCl}_3$ );  $\delta = 159.3, 134.2, 133.1, 130.7, 117.2, 117.2, 86.9$ .

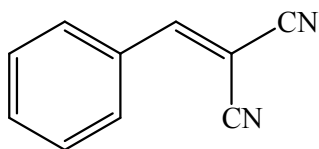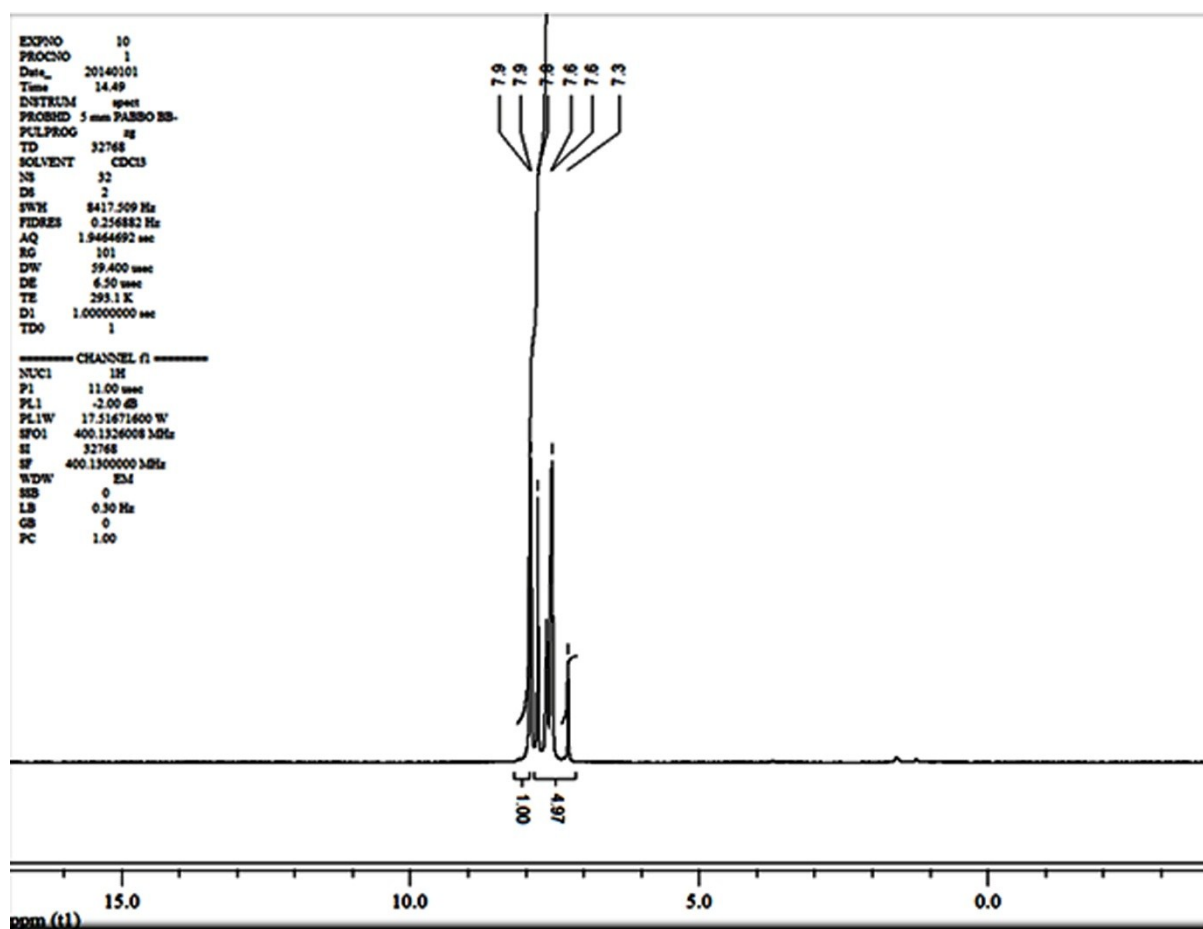

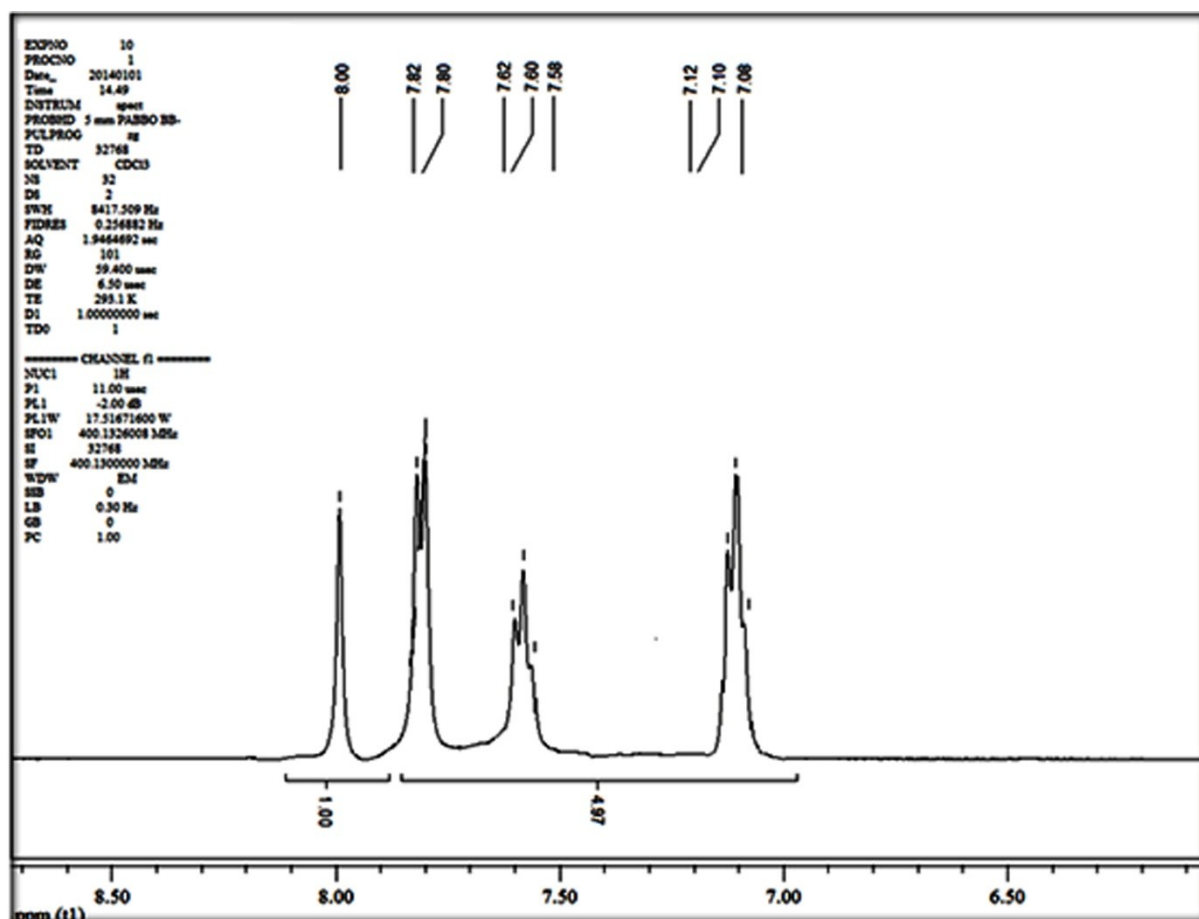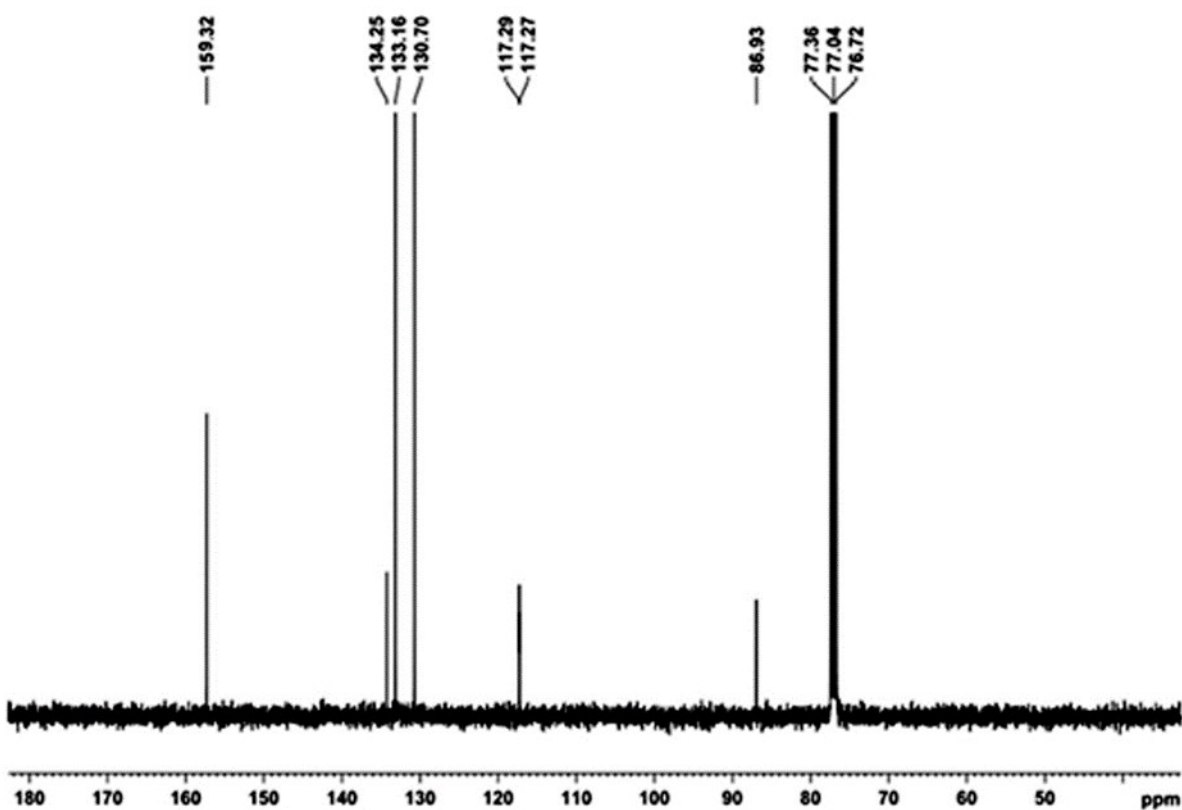

**2-(4-methoxybenzylidene)malononitrile (table 2, entry 2):** Mp: 112-114 °C [59]; <sup>1</sup>H-NMR (400MHz, CDCl<sub>3</sub>): δ (ppm): 7.91 (d, *J* = 10.5 Hz, 2H), 7.65 (s, 1H), 7.01 (d, *J* = 9.0 Hz, 2H), 3.91 (s, 3H); <sup>13</sup>C-NMR (100 MHz, CDCl<sub>3</sub>) δ (ppm): 158.9, 154.4, 136.4, 128.9, 121.2, 120.2, 114.3, 112.9, 111.5, 81.5, 55.9.

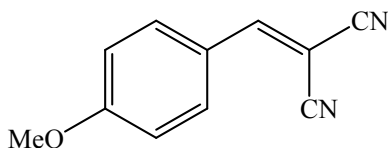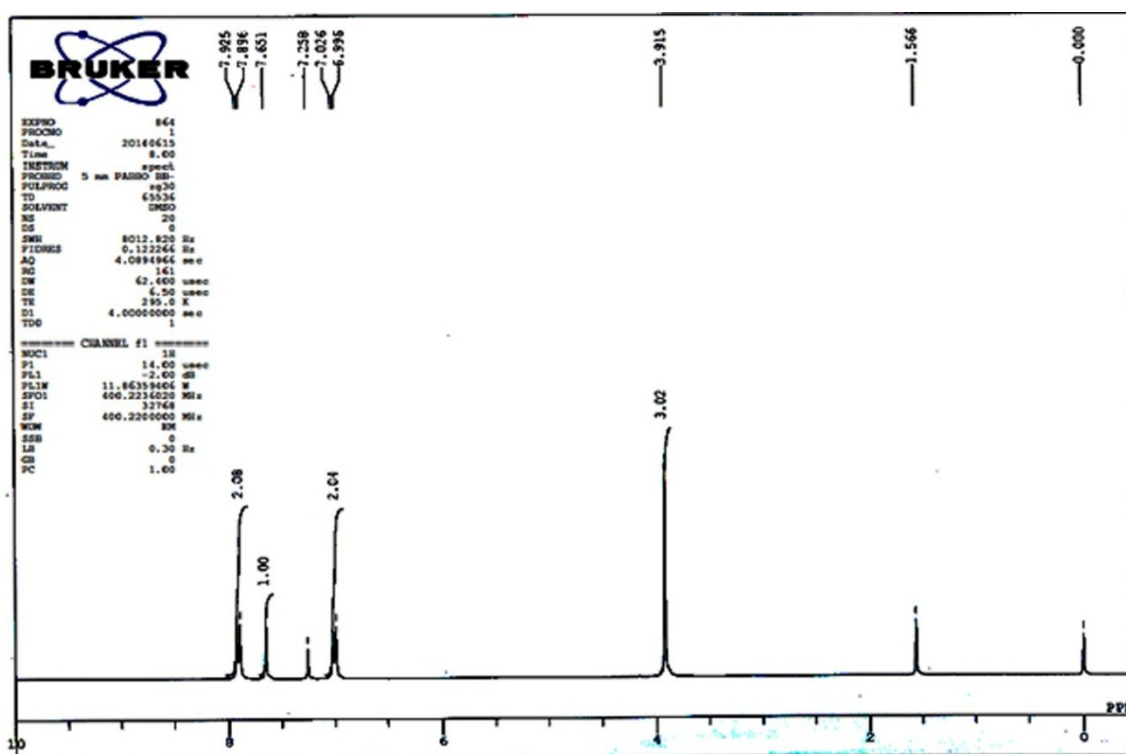

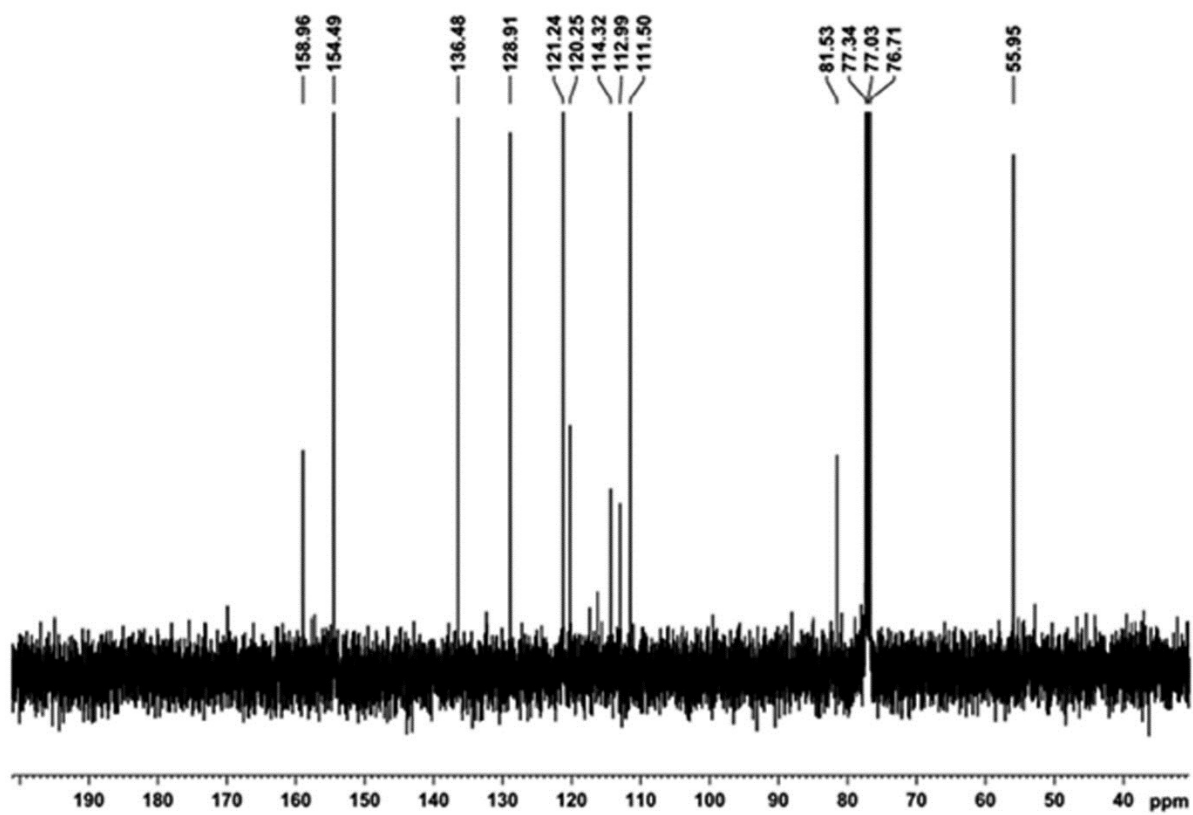

**2-(4-nitrobenzylidene)malononitrile** (table 2, entry 4): Mp:158-159 °C [59]; <sup>1</sup>H-NMR (400MHz, CDCl<sub>3</sub>): δ (ppm): 8.41 (d, *J*=8.84, 2H), 8.10 (d, *J*=8.84, 2H), 7.90 (s, 1H); <sup>13</sup>C-NMR (100 MHz, CDCl<sub>3</sub>) δ (ppm): 156.8, 150.4, 135.8, 131.3, 124.6, 112.6, 111.5, 87.5.

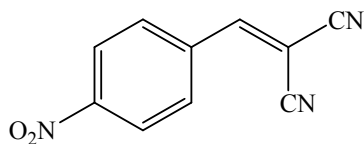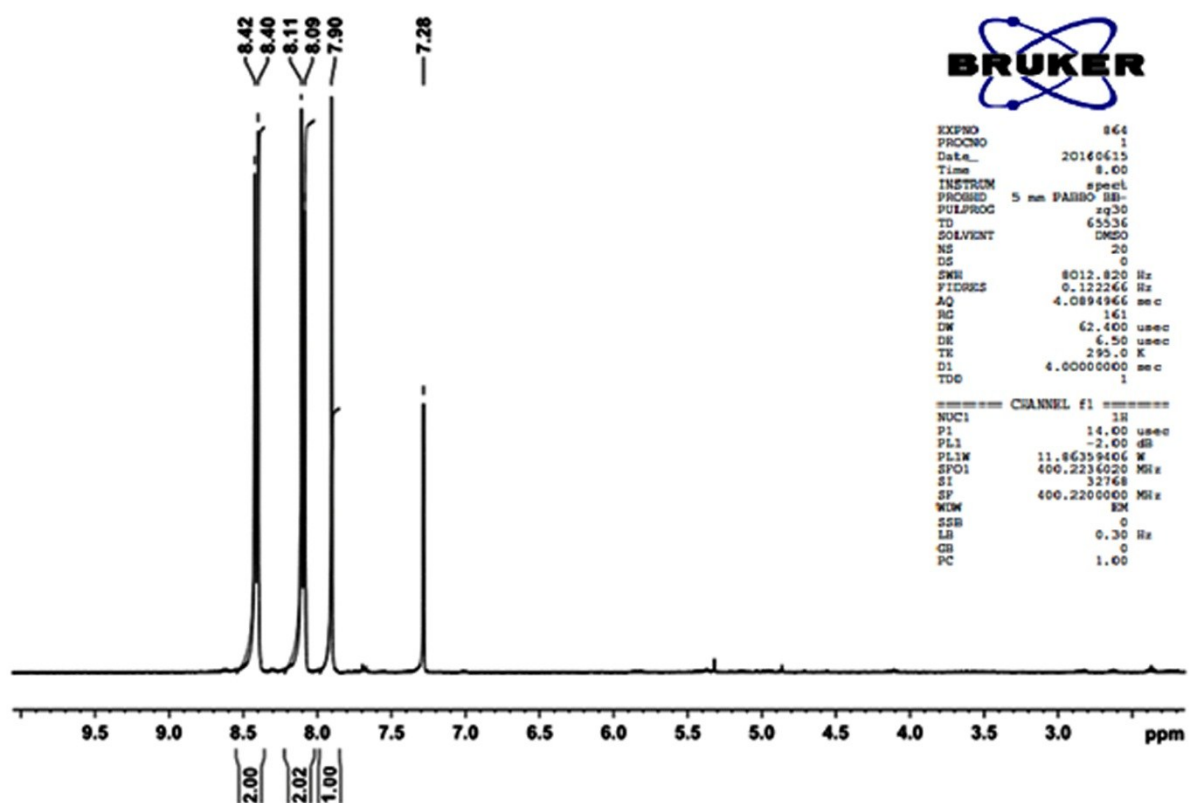

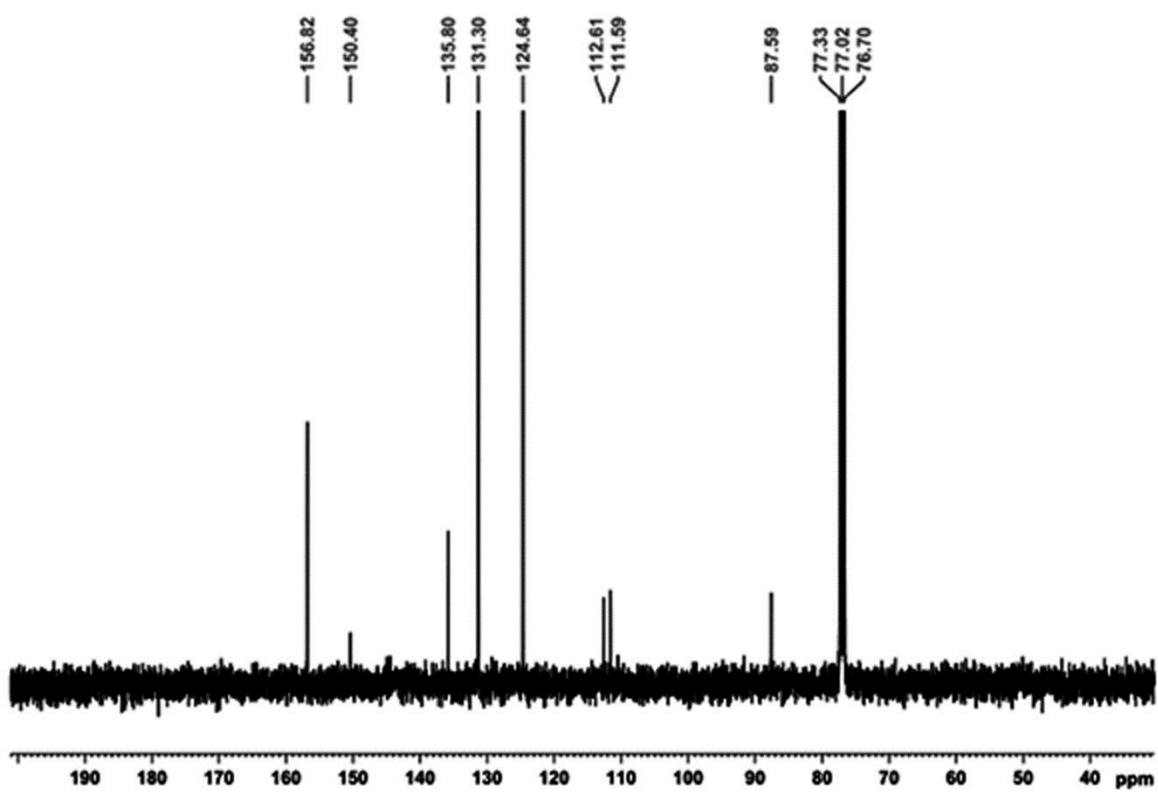

**2-(2-chlorobenzylidene)malononitrile (table 2, entry 5):** Mp:79-82 °C [61]; <sup>1</sup>H-NMR (400MHz, CDCl<sub>3</sub>): δ (ppm): 7.80 (d, *J*=7.84, 2H), 7.74 (s, 1H), 7.71 (d, *J*=7.84, 2H); <sup>13</sup>C-NMR (100 MHz, CDCl<sub>3</sub>) δ (ppm):158.4, 133.1, 131.8, 129.9, 129.6, 113.4, 112.3, 83.5.

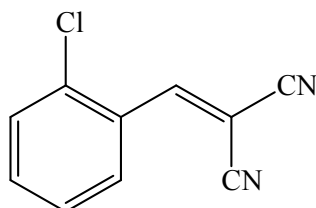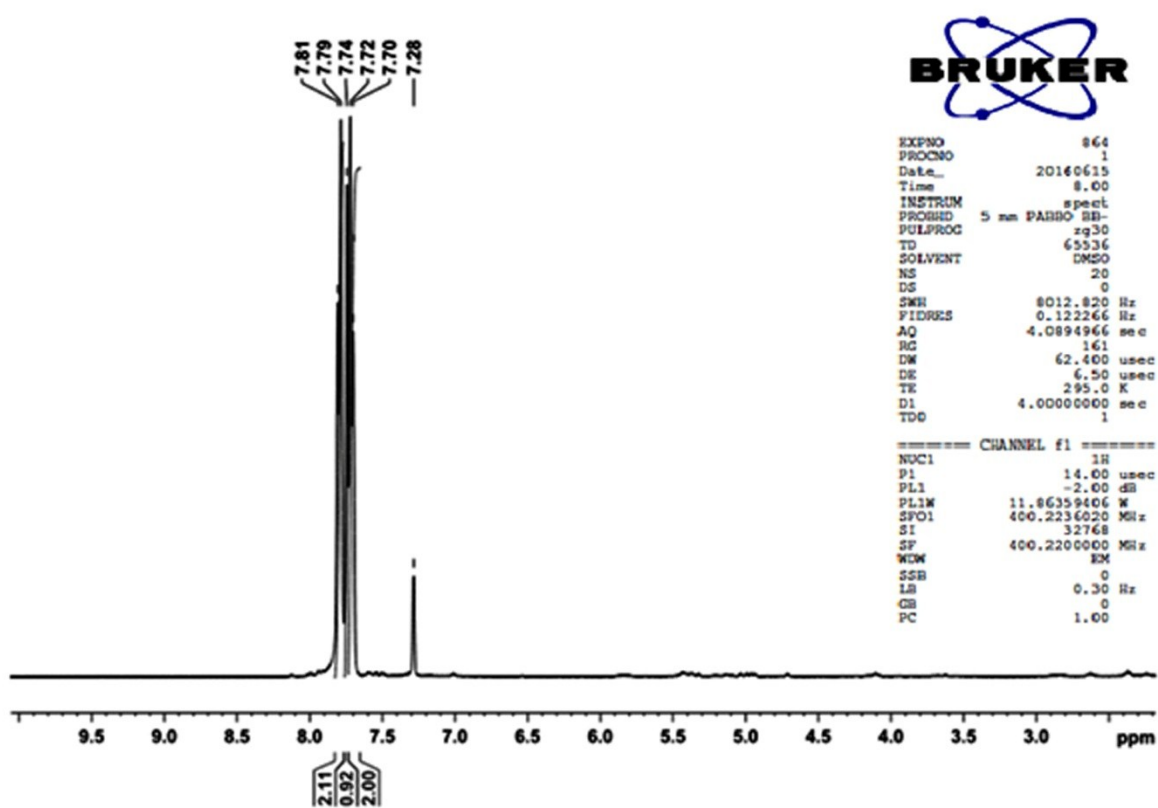



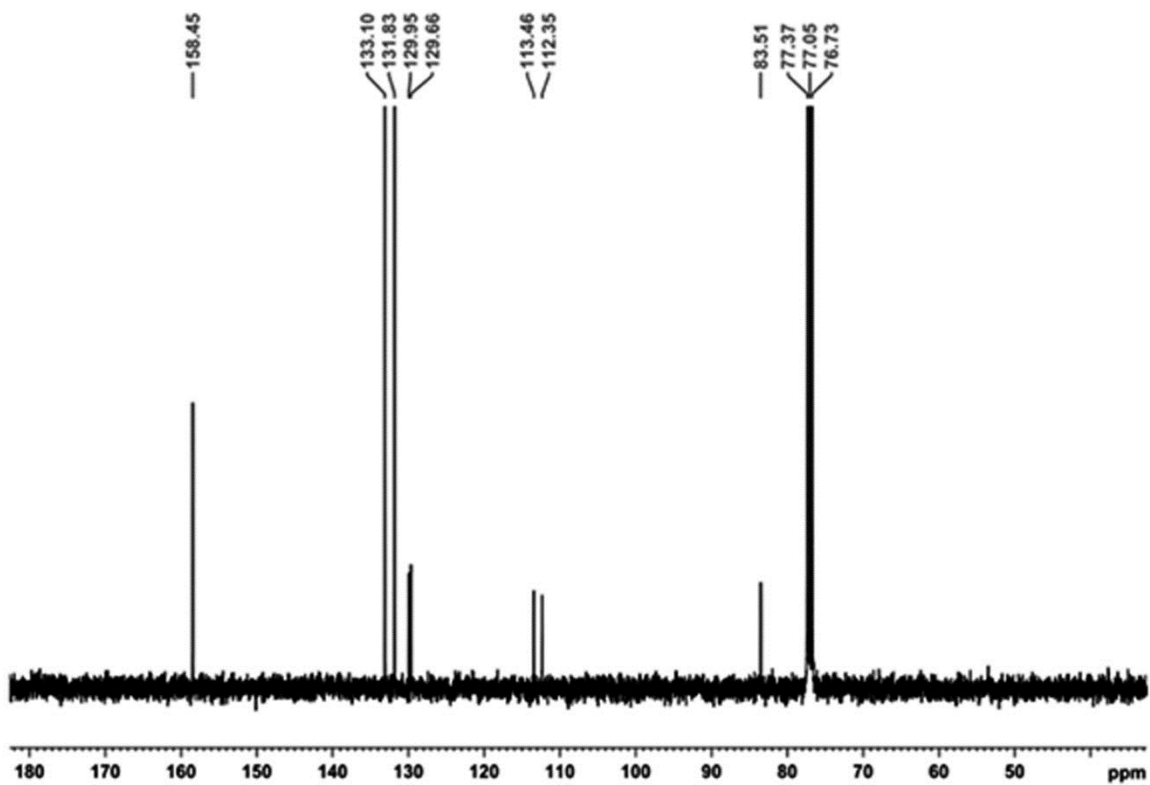

**2-(4-chlorobenzylidene)malononitrile (table 2, entry 6):** Mp:162-164 °C [61]; <sup>1</sup>H-NMR (400MHz, CDCl<sub>3</sub>): δ (ppm):7.78(m, 3H), 7.69(d, *J*=6.8 Hz, 2H). <sup>13</sup>C-NMR (100 MHz, CDCl<sub>3</sub>) δ (ppm):159.6, 134.2, 132.9, 131.1, 130.8, 114.6, 113.5, 84.6.

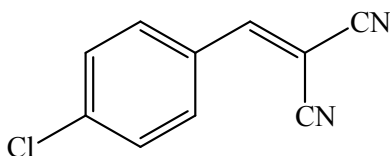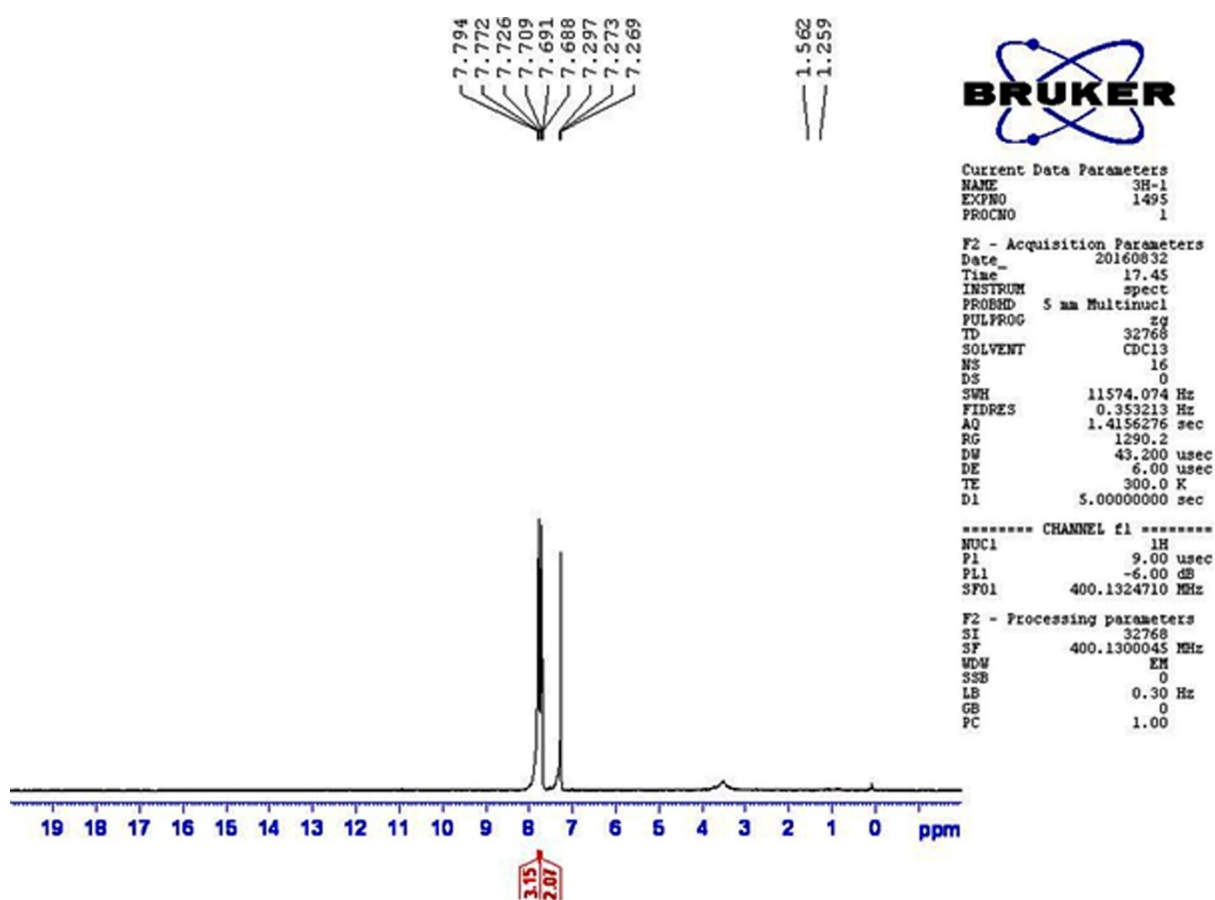

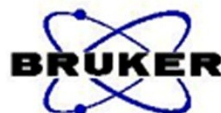

Current Data Parameters  
NAME Carbon13-1  
EXPNO 525  
PROCNO 1

F2 - Acquisition Parameters  
Date\_ 20160832  
Time 18.54  
INSTRUM spect  
PROBHD 5 mm Multinucl  
PULPROG zgpg30  
TD 65536  
SOLVENT CDCl3  
NS 1000  
DS 4  
SWH 40404.039 Hz  
FIDRES 0.616517 Hz  
AQ 0.8110580 sec  
RG 32768  
DW 12.375 usec  
DE 6.00 usec  
TE 300.0 K  
D1 1.00000000 sec  
d11 0.03000000 sec  
d12 0.00002000 sec

\*\*\*\*\* CHANNEL f1 \*\*\*\*\*  
NUC1 13C  
P1 7.50 usec  
PL1 -2.00 dB  
SF01 100.6204965 MHz

\*\*\*\*\* CHANNEL f2 \*\*\*\*\*  
CFDPRG2 waltz16  
NUC2 1H  
PCPD2 80.00 usec  
PL2 -4.00 dB  
PL12 18.50 dB  
PL13 18.50 dB  
SF02 400.1316005 MHz

F2 - Processing parameters  
SI 32768  
SF 100.6126546 MHz  
WDW EM  
SSB 0  
LB 1.00 Hz  
GB 0  
PC 1.40

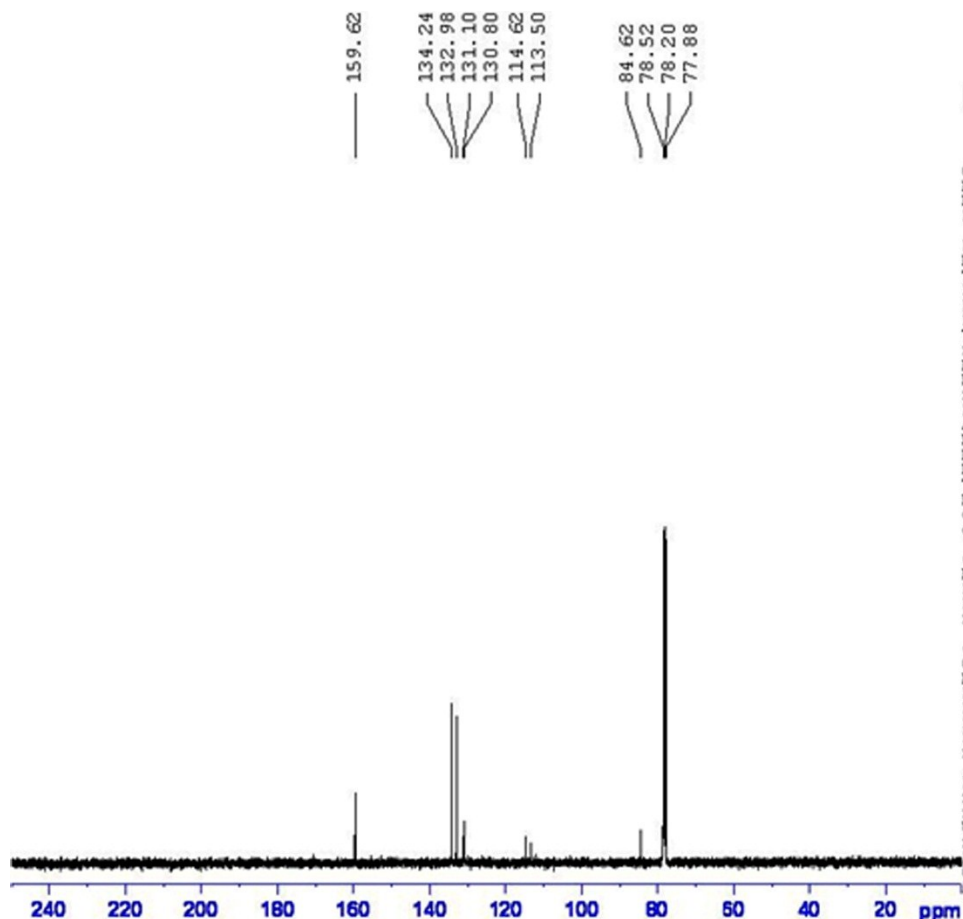

**Ethyl 2-cyano-3-(3-nitrophenyl)acrylate (table 2, entry 8):** Mp: 130-132 °C [63]; <sup>1</sup>H-NMR (400 MHz, CDCl<sub>3</sub>): δ (ppm): 1.44 (t, *J* = 8.00 Hz, 3H), 4.44 (q, *J* = 8.10 Hz, 2H), 7.28 (d, *J* = 8.20 Hz, 1H), 7.76 (t, *J* = 8.25 Hz, 1H), 8.33 (s, 1H), 8.43 (d, *J* = 8.78 Hz, 1H), 8.72 (s, 1H); <sup>13</sup>C-NMR (100 MHz, CDCl<sub>3</sub>) δ (ppm): 160.9, 151.2, 148.2, 134.8, 132.4, 130.0, 126.4, 126.2, 113.9, 106.3, 62.6, 13.5.

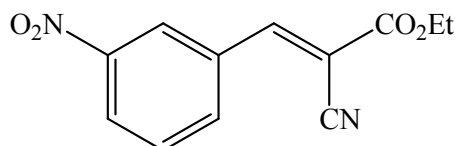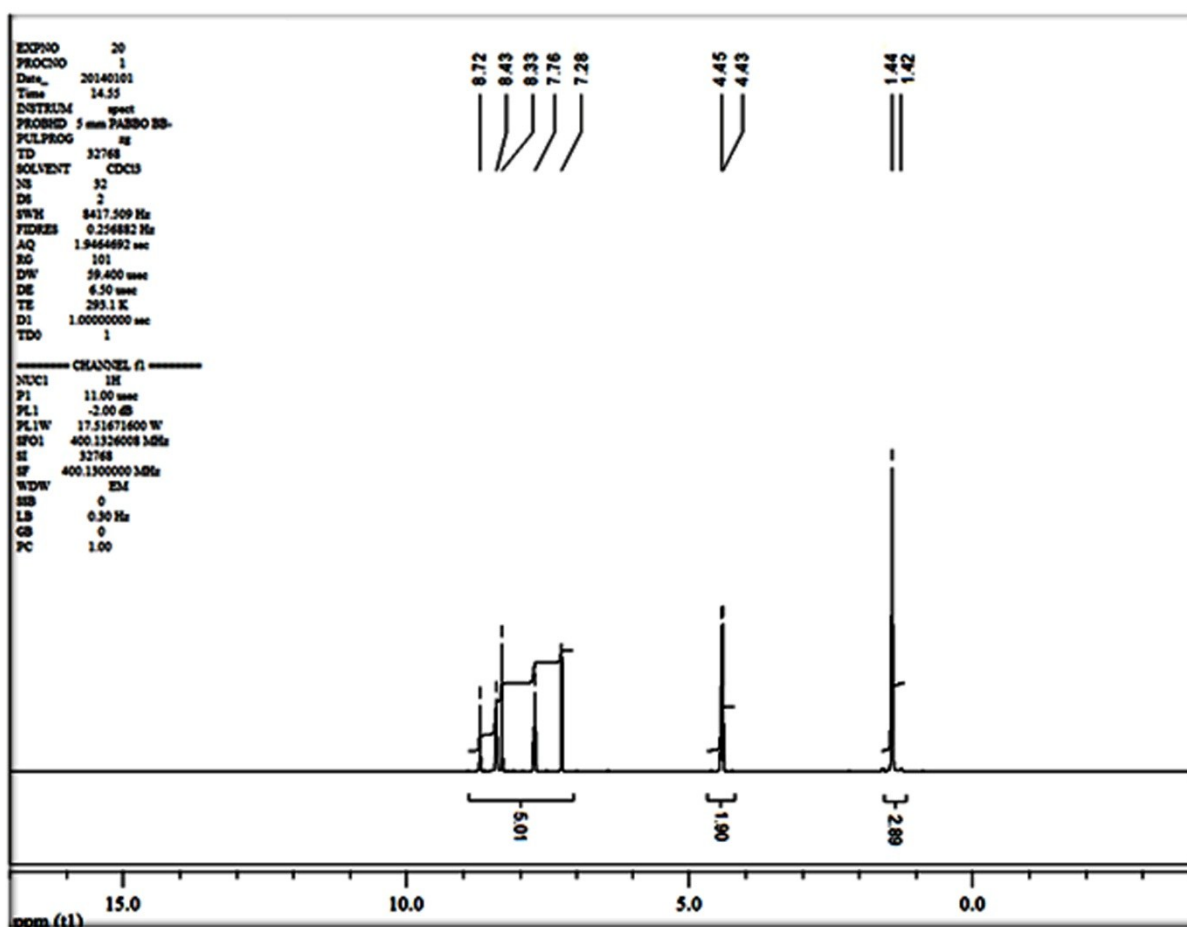

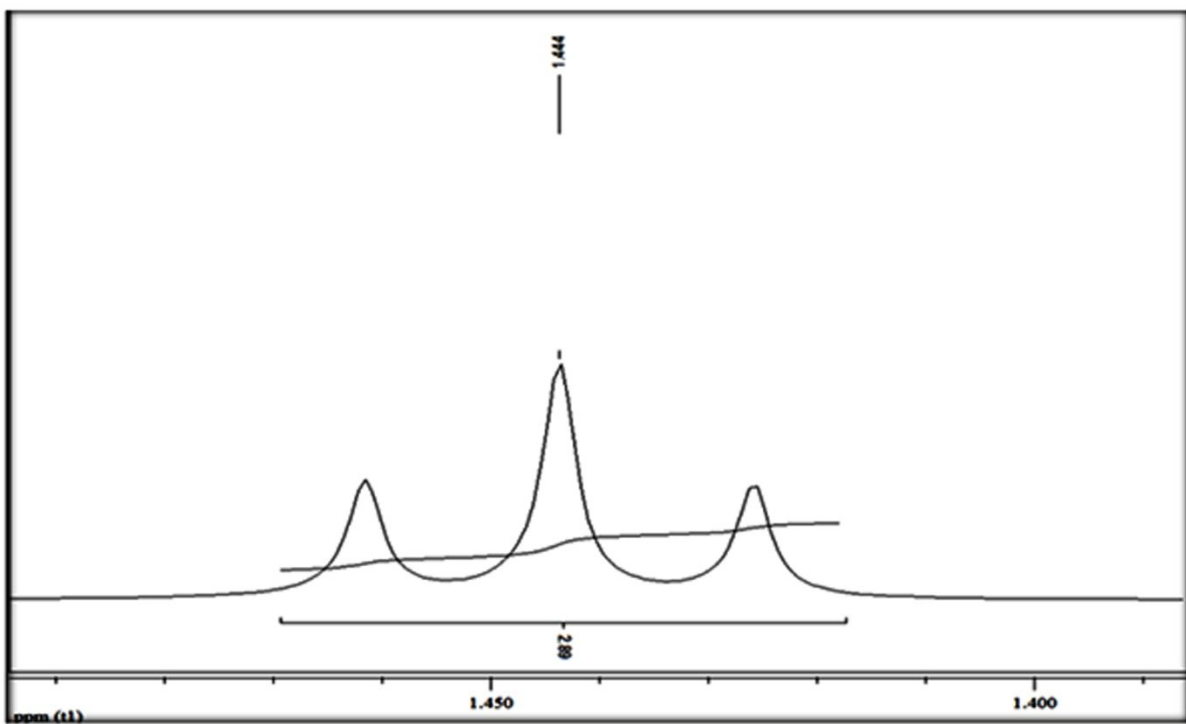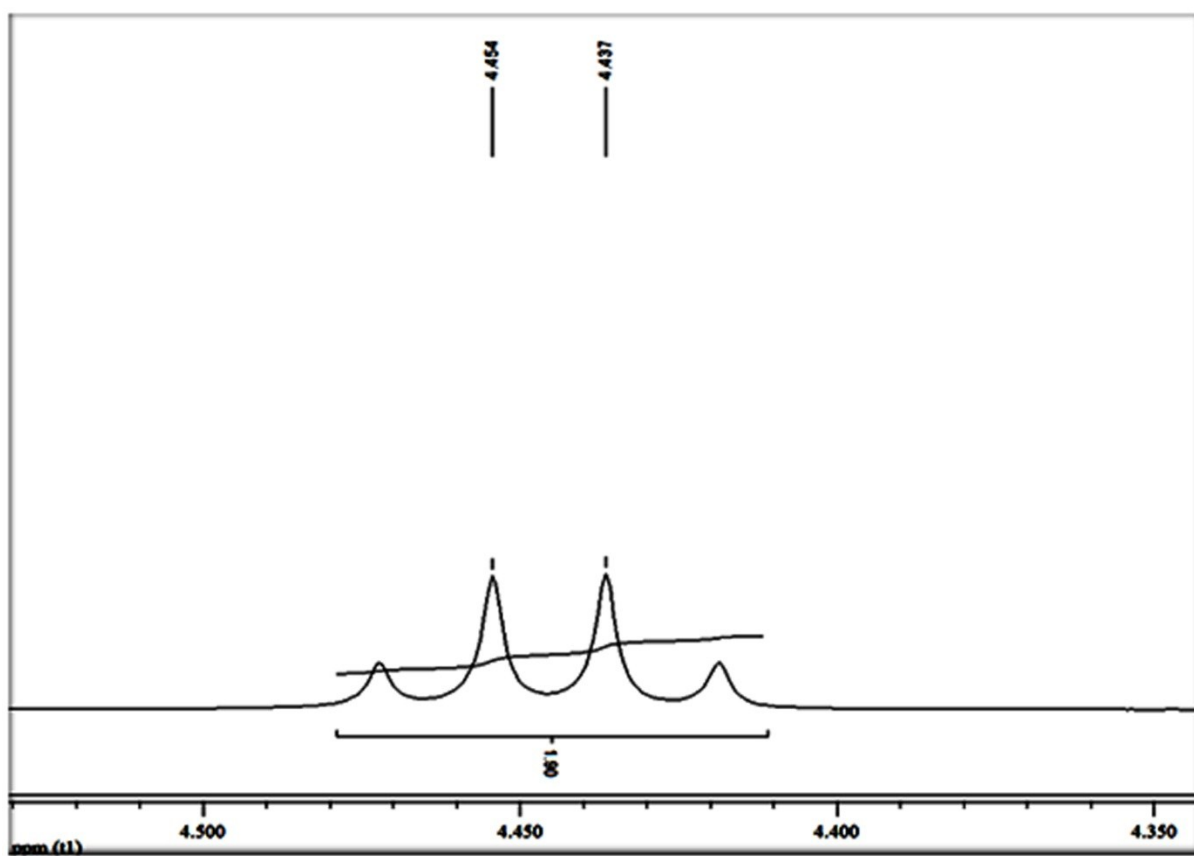

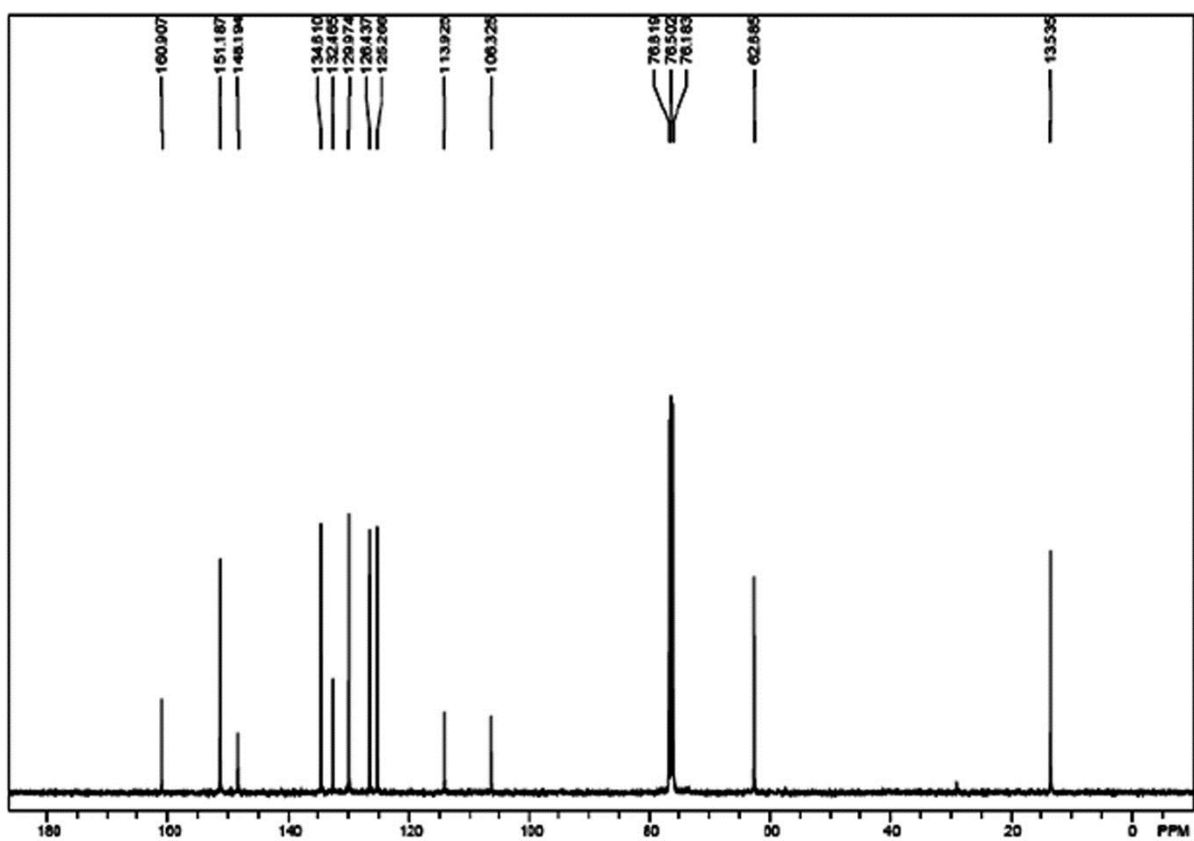

**Ethyl 2-cyano-3-phenylacrylate (table 2, entry 9):** Mp: 50-52 °C [59]; <sup>1</sup>H-NMR (400MHz, CDCl<sub>3</sub>): δ (ppm): 1.49 (t, *J*= 6.8 Hz, 3H) 4.16 (q, *J*= 6.8 Hz, 2H) 6.99-7.01 (m, 3H) 7.65 (d, *J*=8.4Hz, 1H) 7.66-7.90 (m, 2H); <sup>13</sup>C-NMR (100 MHz, CDCl<sub>3</sub>) δ (ppm): 162.5, 155.1, 155.0, 133.3, 131.4, 131.1, 129.3, 115.5, 103.0, 62.7, 14.2.

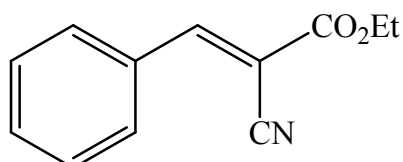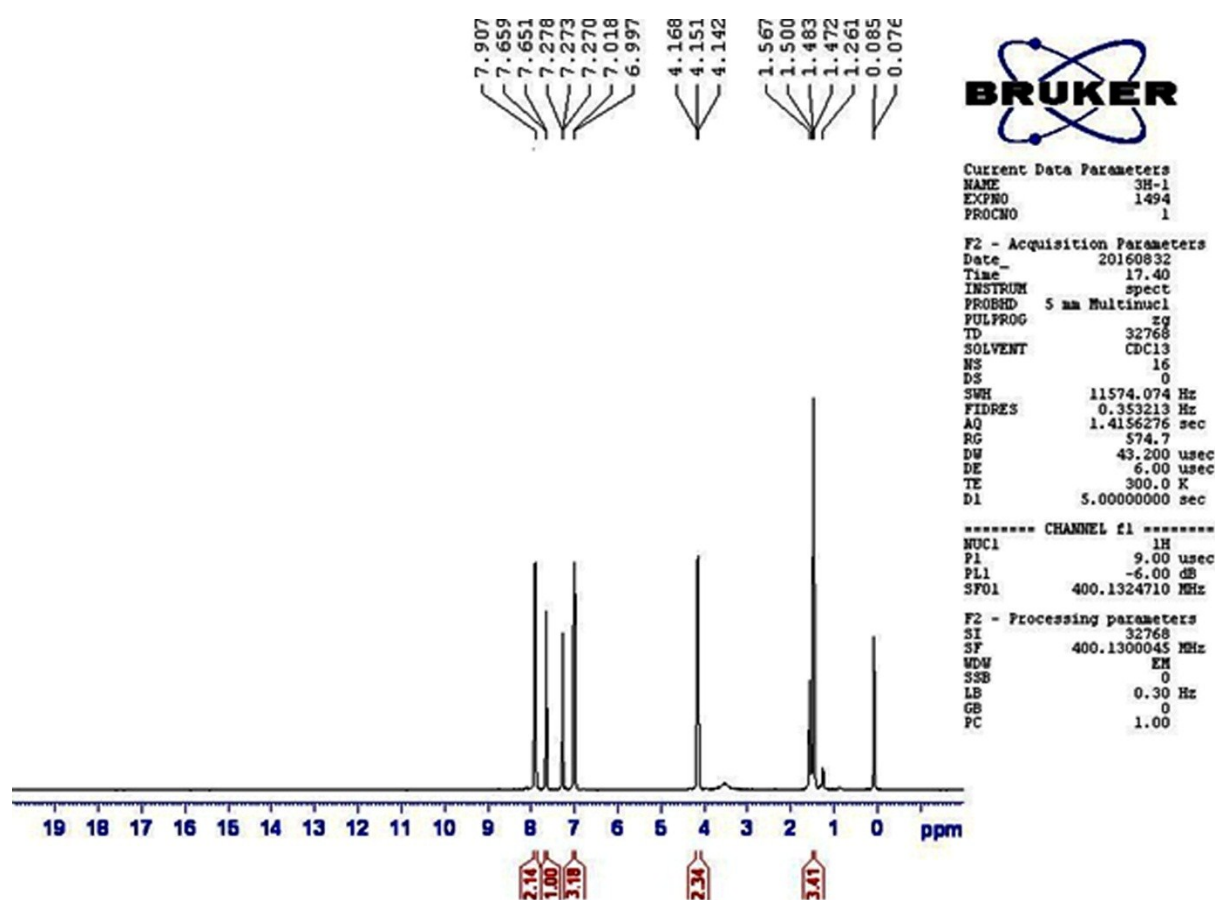

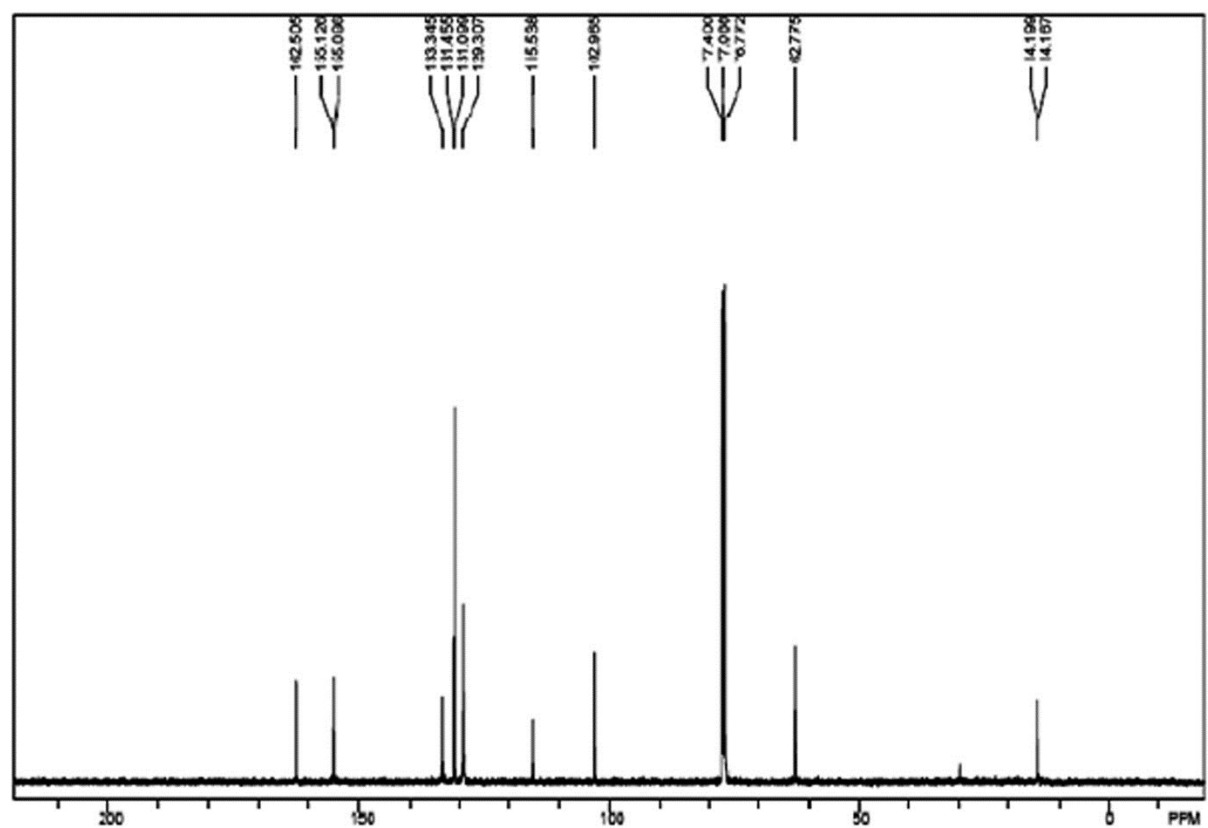



**Ethyl 3-(4-chlorophenyl)-2-cyanoacrylate (table 2, entry 12):** Mp: 87-89 °C [64]; <sup>1</sup>H-NMR (400 MHz, CDCl<sub>3</sub>): δ (ppm): 8.20 (s, 1H), 7.93 (d, *J* = 8.0 Hz, 2H), 7.48 (d, *J* = 8.4 Hz, 2H), 4.39 (q, *J* = 7.2 Hz, 2H), 1.40 (t, *J* = 7.2 Hz, 3H); <sup>13</sup>C-NMR (100 MHz, CDCl<sub>3</sub>) δ (ppm): 162.2, 153.3, 139.5, 132.1, 129.9, 129.6, 115.2, 103.6, 62.8, 14.1.

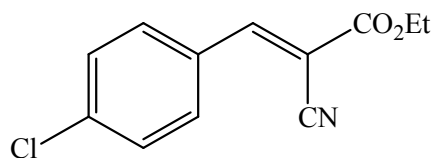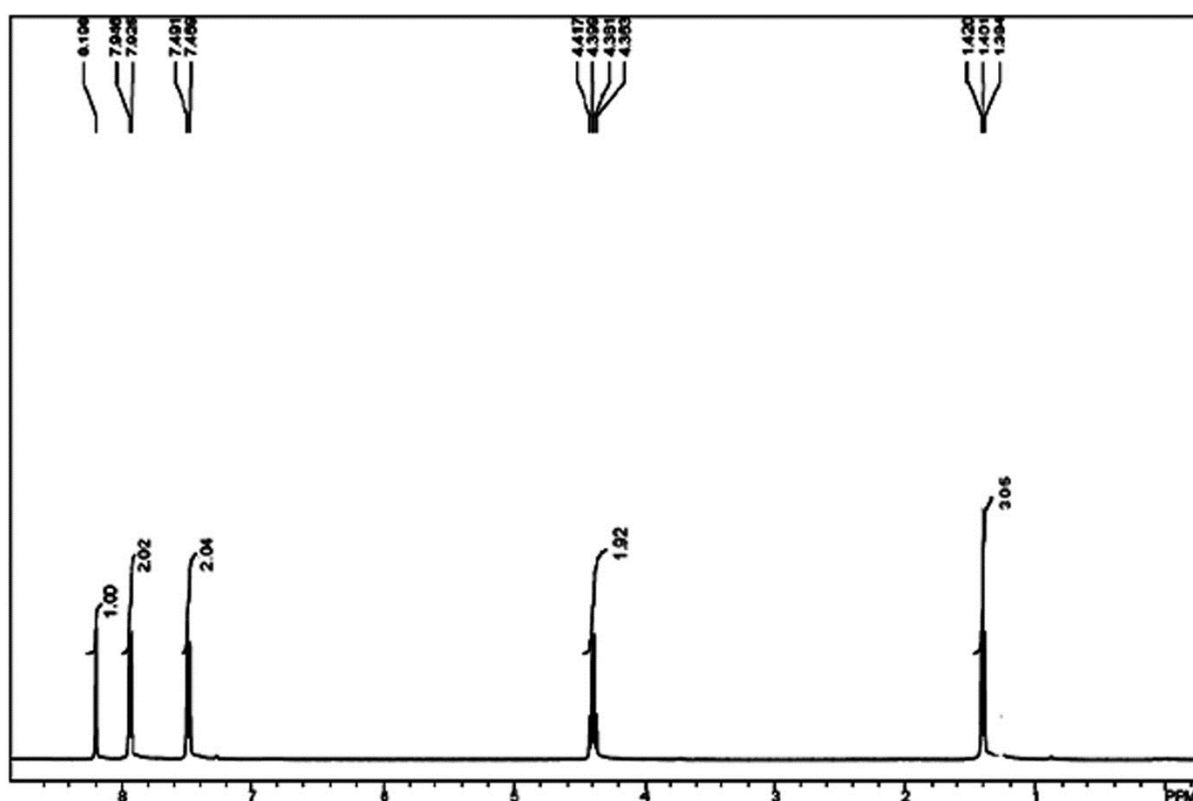

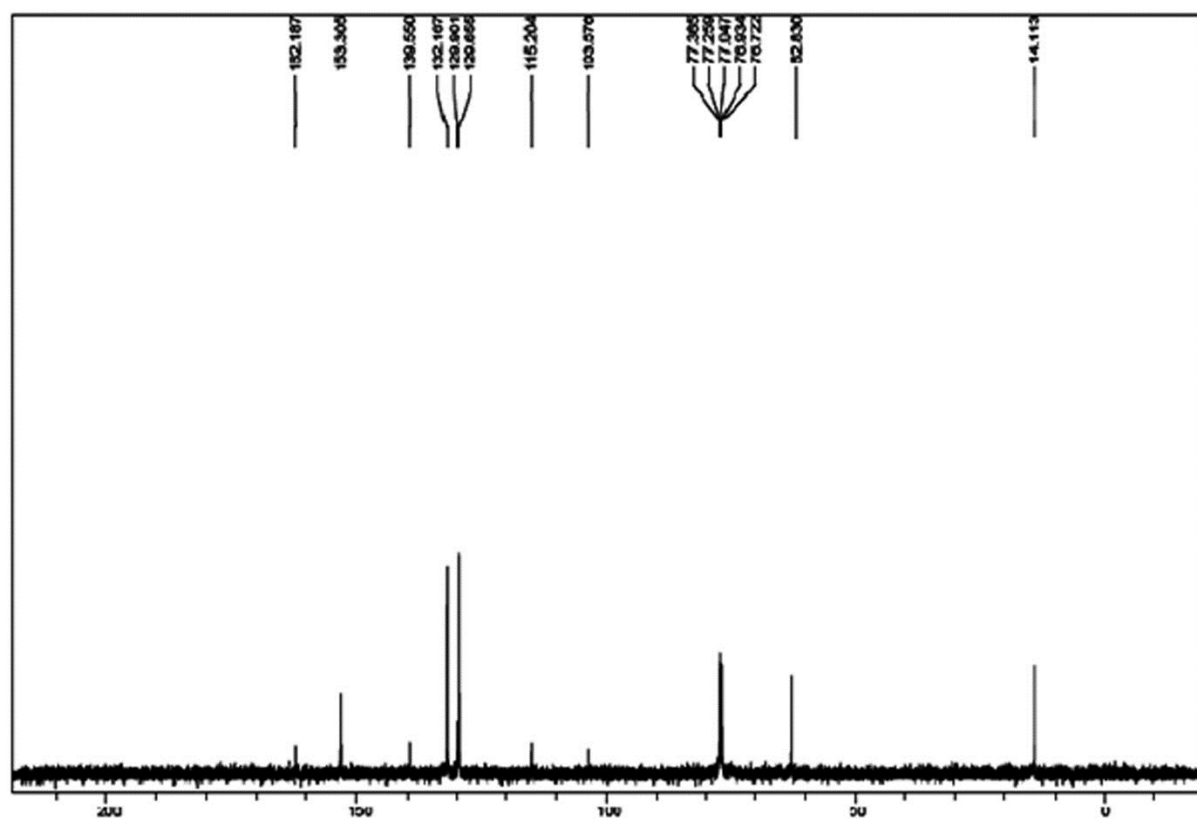

## NMR Spectra of 2,3-dihydroquinazolin-4(1H)-one Products

**2-Phenyl-2,3-dihydroquinazolin-4(1H)-one**(table 4, entry 1):Mp:223-224 °C [66]; <sup>1</sup>H-NMR (400 MHz, DMSO-d<sub>6</sub>): δ (ppm):8.29 (s, 1H), 7.63 (d, *J* = 7.8 Hz, 1H), 7.51 (d, *J* = 7.1 Hz, 2H), 7.41-7.35 (m, 3H), 7.26 (t, *J* = 7.8 Hz, 1H), 7.11 (s, 1H), 6.76 (d, *J* = 7.8 Hz, 1H), 6.69 (t, *J* = 7.8 Hz, 1H), 5.76 (s, 1H); <sup>13</sup>C-NMR (100 MHz, DMSO-d<sub>6</sub>) δ (ppm):163.6, 147.8, 141.6, 133.3, 128.4, 128.3, 127.3, 126.8, 117.1, 114.9, 114.4, 66.5.

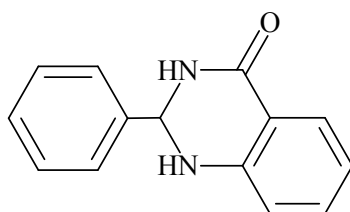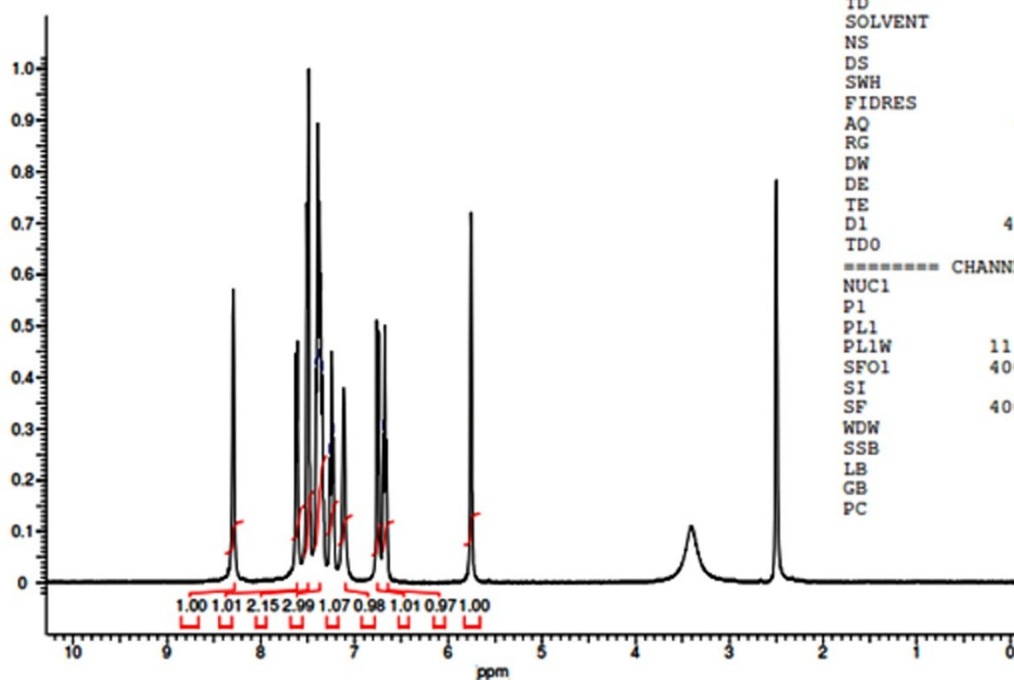

```
EXPNO           864
PROCNO          1
Date_           20160615
Time            8.00
INSTRUM         spect
PROBHD          5 mm PABBO BB-
PULPROG         zg30
TD              65536
SOLVENT         DMSO
NS              20
DS              0
SWH             8012.820 Hz
FIDRES          0.122266 Hz
AQ             4.0894966 sec
RG              161
DW             62.400 usec
DE             6.50 usec
TE             295.0 K
D1             4.0000000 sec
TD0            1
===== CHANNEL f1 =====
NUC1            1H
P1             14.00 usec
PL1            -2.00 dB
PL1W          11.86359406 W
SFO1           400.2236020 MHz
SI             32768
SF            400.2200000 MHz
WDW            EM
SSB            0
LB             0.30 Hz
GB             0
PC             1.00
```

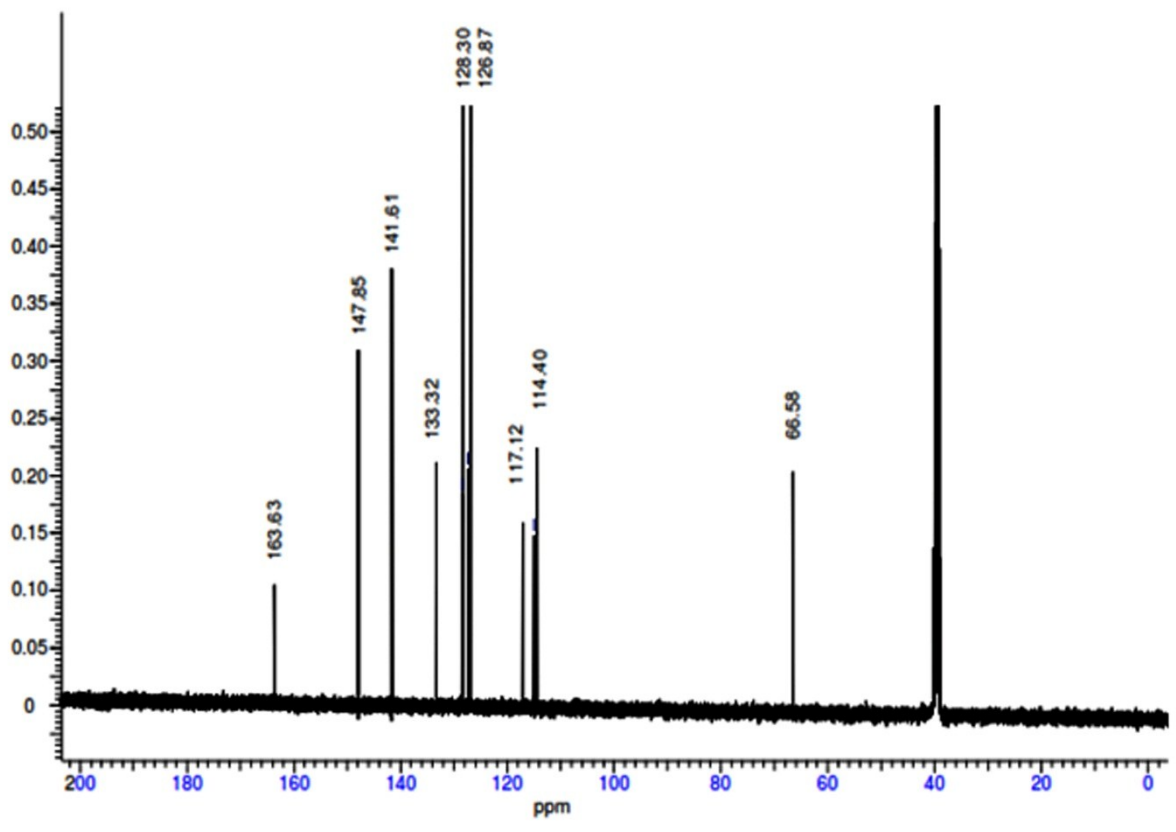

**2-(4-Bromophenyl)-2,3-dihydroquinazolin-4(1H)-one** (table 4, entry 2): Mp:197-200 °C [38]; <sup>1</sup>H-NMR (400 MHz, DMSO-d<sub>6</sub>): δ (ppm):8.17-8.13 (m, 1H), 7.80-7.78 (m, 1H), 7.63-7.60 (m, 3H), 7.47-7.45 (m, 2H), 7.28-7.24 (m, 1H), 6.74 (d, *J* = 8.4, 1H), 6.71-6.68 (m, 1H), 5.76 (s, 1H); <sup>13</sup>C-NMR (100 MHz, DMSO-d<sub>6</sub>) δ (ppm):164.3, 154.4, 148.1, 133.9, 132.3, 130.2, 130.0, 127.8, 126.5, 118.1, 117.8, 114.9, 110.3, 61.3.

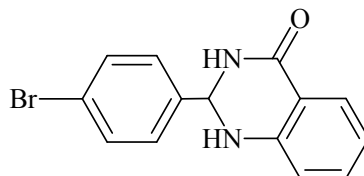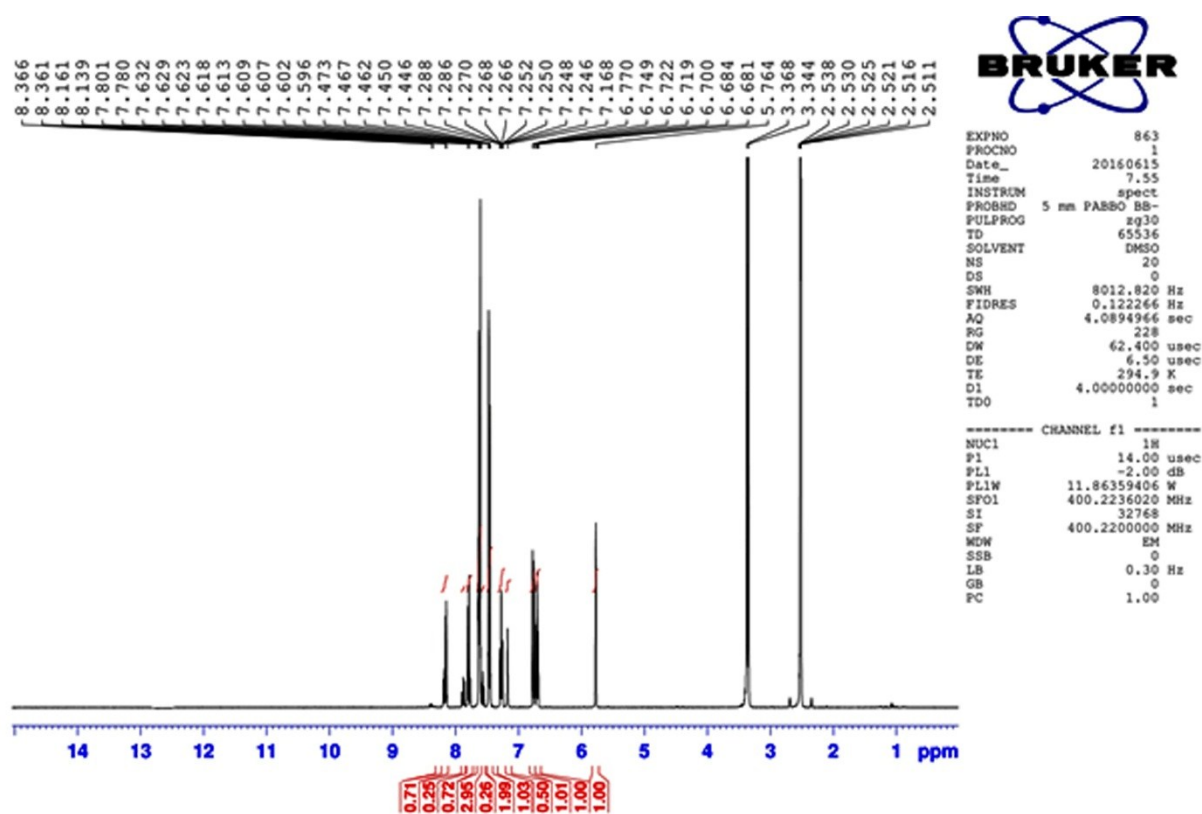

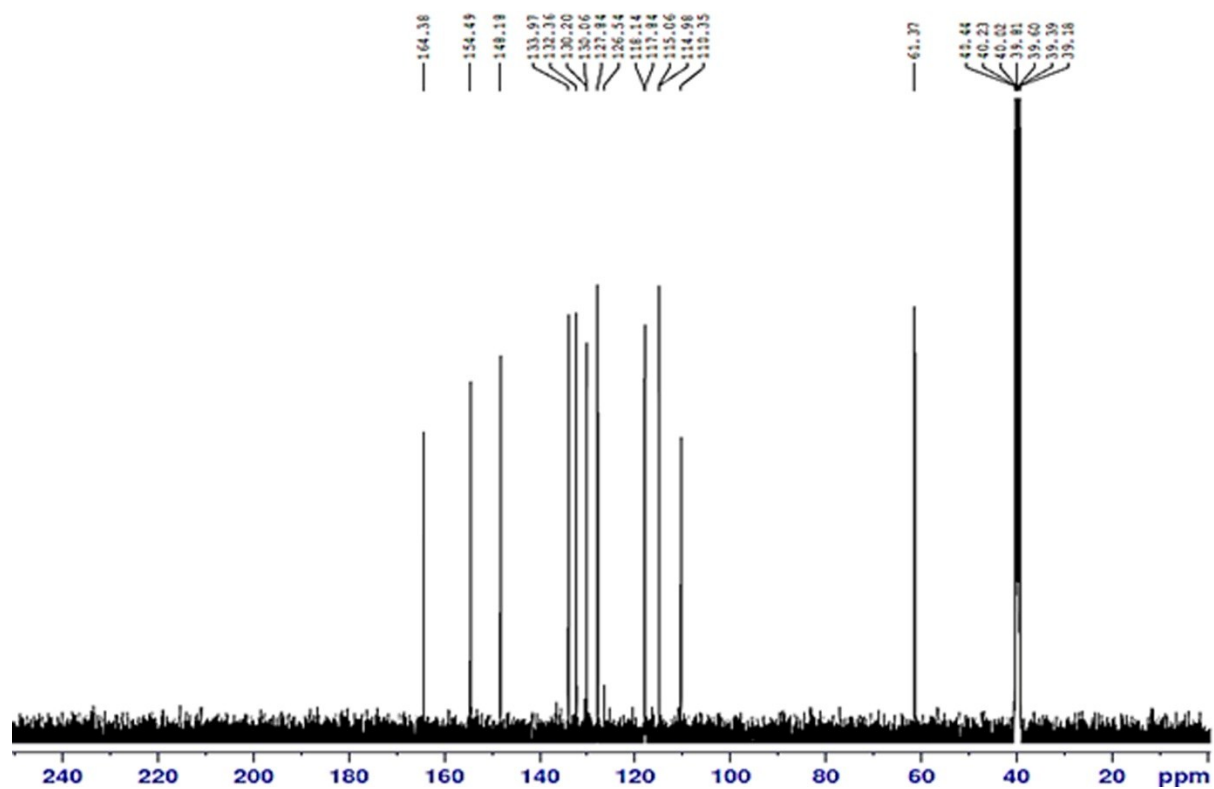

**2-(4-Chlorophenyl)-2,3-dihydroquinazolin-4(1H)-one**(table 4, entry 4):Mp:202-203 °C [66]; <sup>1</sup>H-NMR (400 MHz, DMSO-d<sub>6</sub>): δ (ppm):8.33 (s, 1H), 7.62 (dd, *J* = 8.0 Hz, *J* = 1.1 Hz, 1H), 7.52 (d, *J* = 8.6 Hz, 2H), 7.47 (d, *J* = 8.6 Hz, 2H), 7.27-7.23 (m, 1H), 7.14 (s, 1H), 6.76 (dd, *J* = 8.0 Hz, *J* = 1.1 Hz, 1H), 6.70-6.66 (m, 1H), 5.77 (s, 1H); <sup>13</sup>C-NMR (100 MHz, DMSO-d<sub>6</sub>) δ (ppm):163.4, 147.6, 140.6, 133.3, 132.9, 128.7, 128.2, 127.3, 117.2, 114.9, 114.4, 65.7.

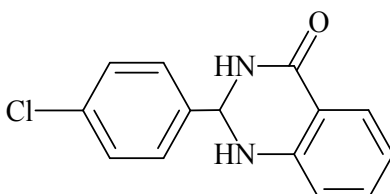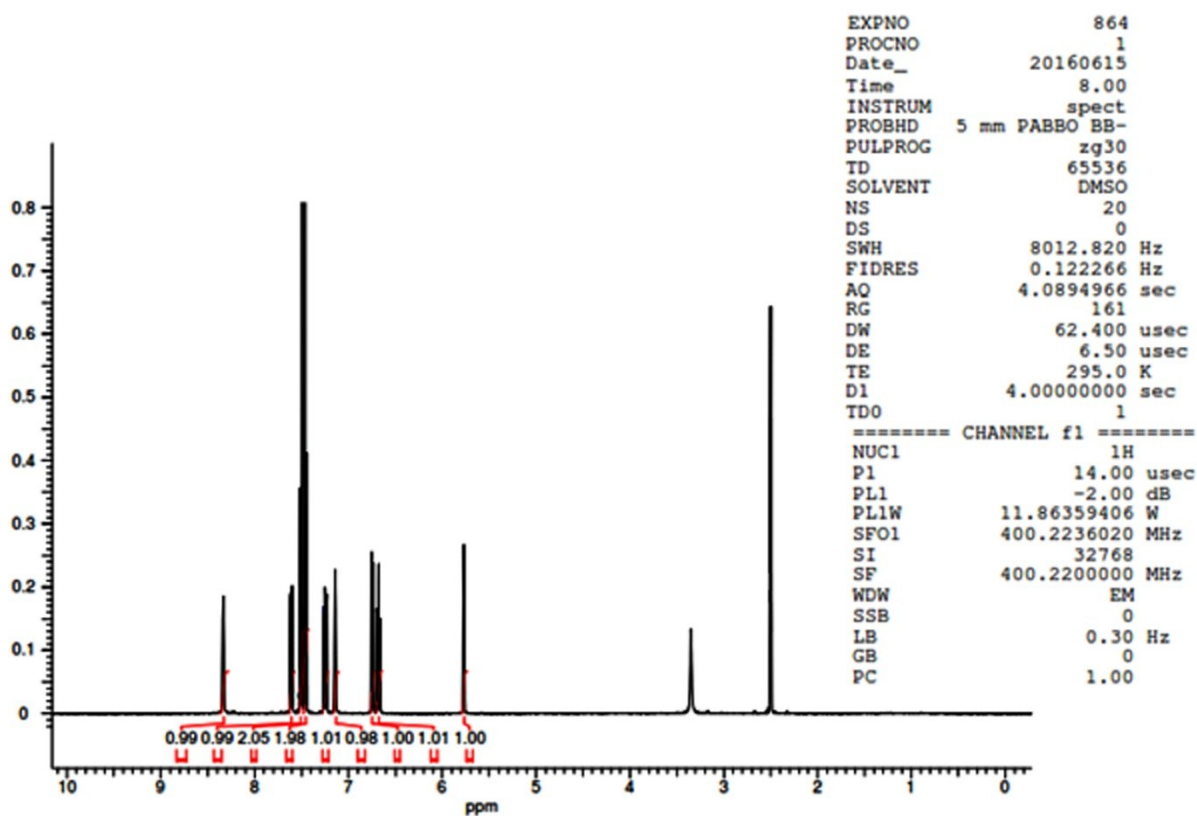

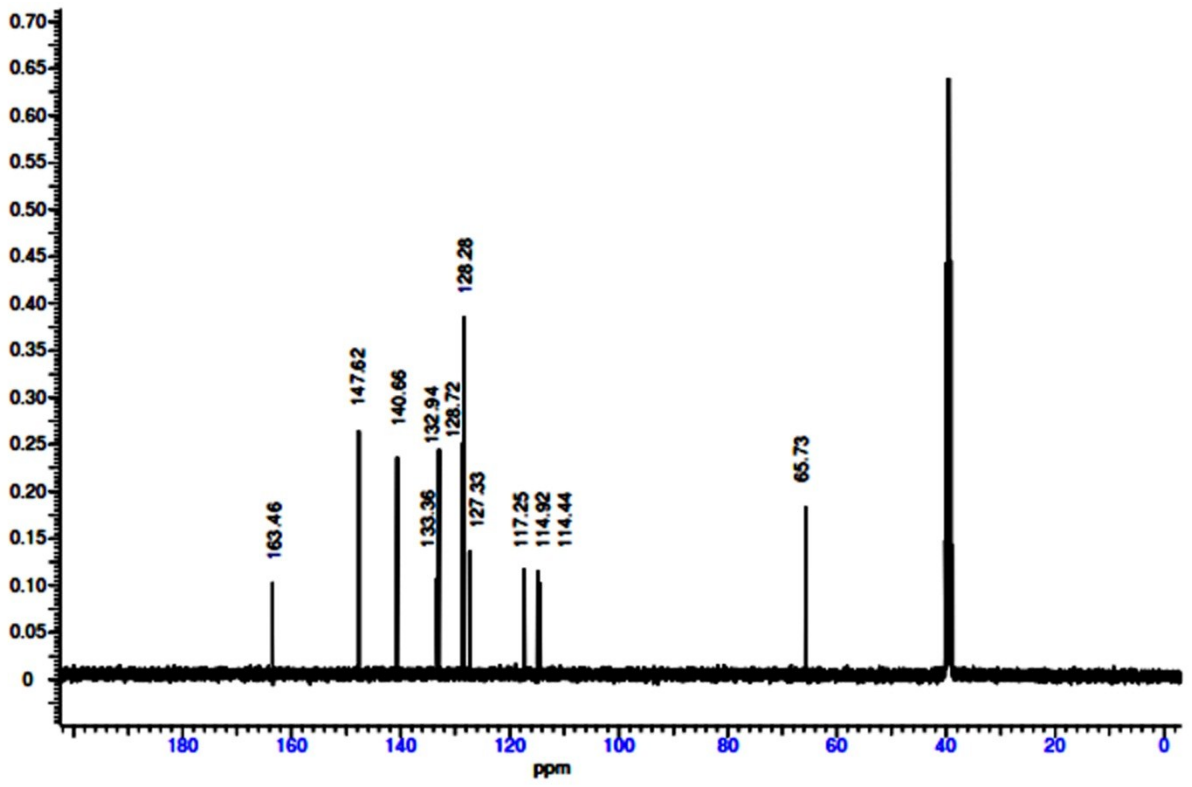



**2-(2-Chlorophenyl)-2,3-dihydroquinazolin-4(1H)-one** (table 4, entry 5): Mp: 228-230 °C [67]; <sup>1</sup>H-NMR (400 MHz, DMSO-d<sub>6</sub>): δ (ppm): 8.40 (s, 1H), 7.62 (d, *J* = 7.6 Hz, 1H), 7.53 (s, 1H), 7.44-7.41 (m, 3H), 7.27 (t, *J* = 7.6 Hz, 1H), 7.21 (s, 1H), 6.77 (d, *J* = 7.6 Hz, 1H), 6.70 (t, *J* = 7.6 Hz, 1H), 5.78 (s, 1H); <sup>13</sup>C-NMR (100 MHz, DMSO-d<sub>6</sub>) δ (ppm): 164.1, 148.3, 141.9, 137.9, 133.6, 129.5, 128.7, 127.8, 127.6, 124.3, 117.6, 115.2, 114.8, 66.9.

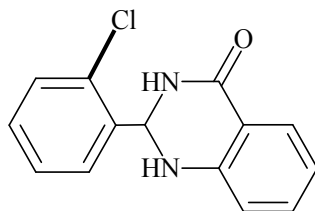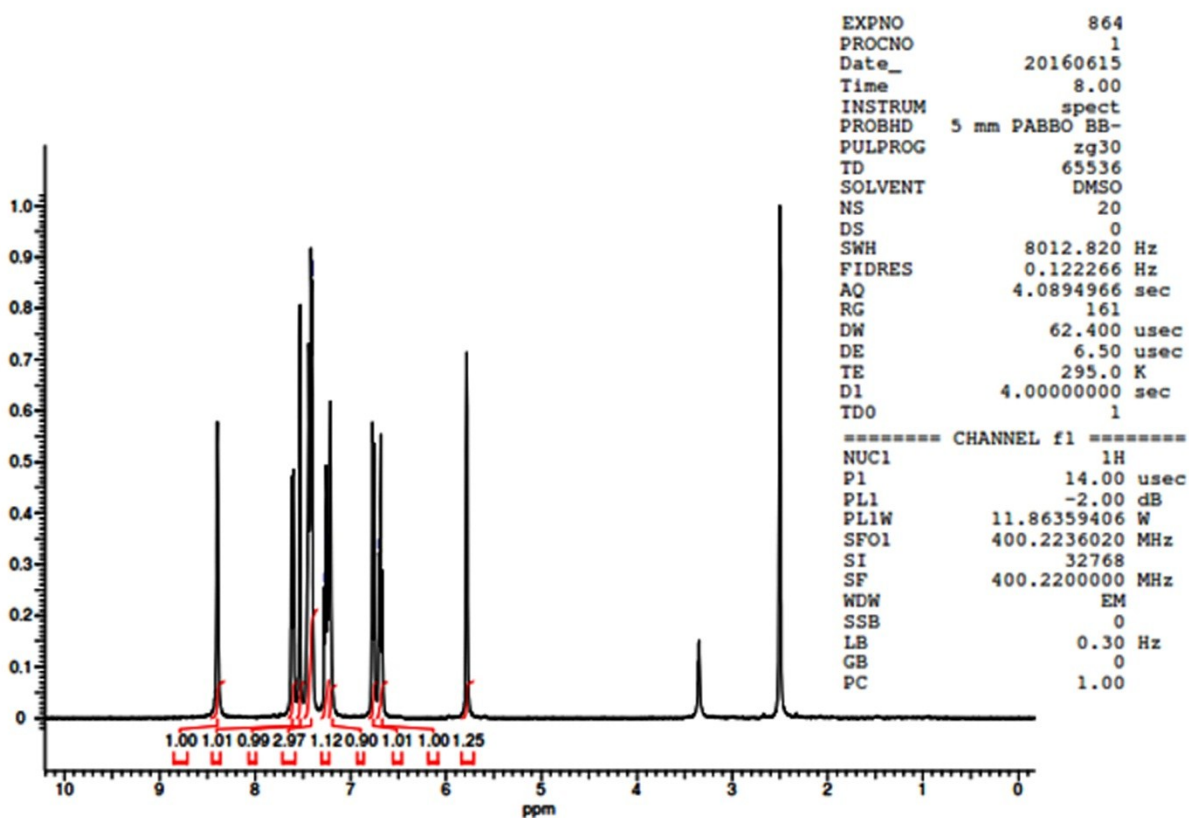

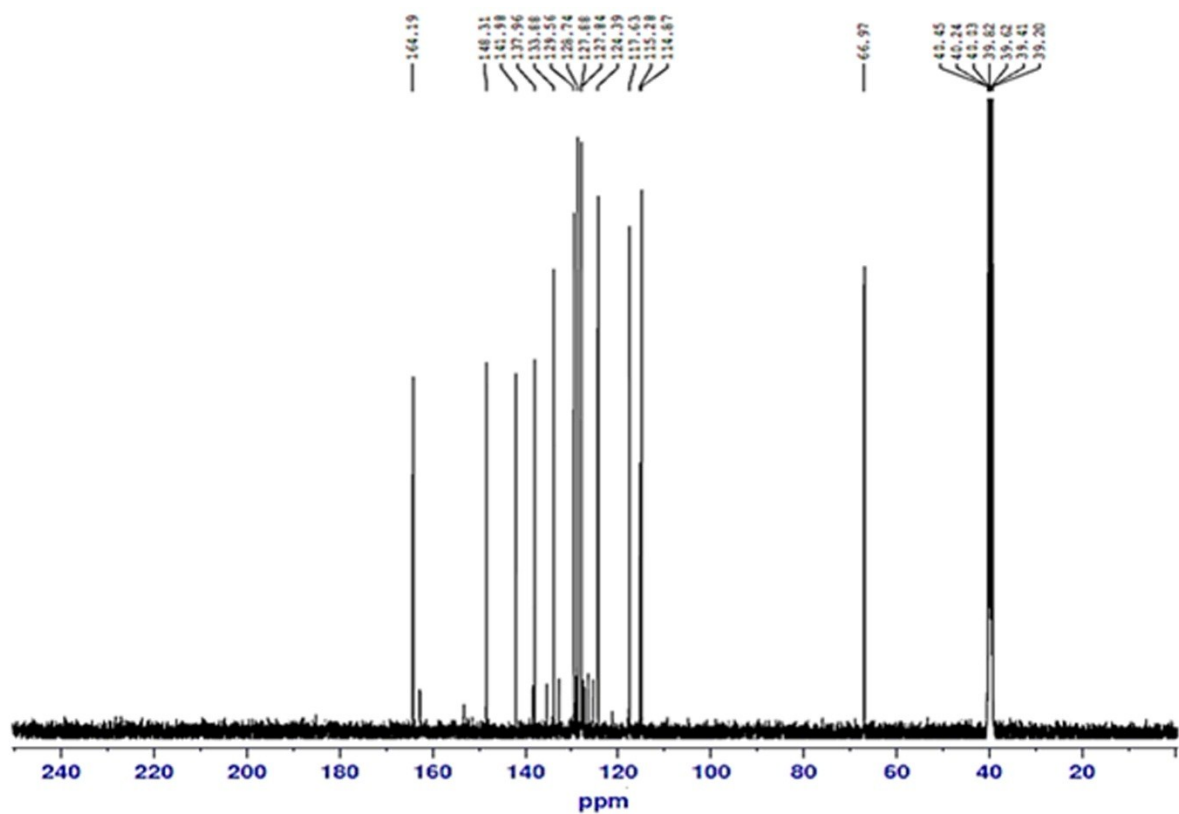

**2-(2-Hydroxy-4-methoxyphenyl)-2,3-dihydroquinazolin-4(1H)-one** (table 4, entry 6):  
 Mp: 262-263 °C [68]; <sup>1</sup>H-NMR (400 MHz, DMSO-d<sub>6</sub>): δ (ppm): 9.35 (s, 1H), 7.68 (d, J = 6.8 Hz, 1H), 7.57 (s, 1H), 7.22 (d, J = 8.4 Hz, 1H), 7.15-7.13 (m, 1H), 6.98 (s, 1H), 6.68-6.66 (m, 2H), 6.38 (s, 1H), 6.29-6.27 (m, 1H), 5.96 (s, 1H), 3.65 (s, 3H); <sup>13</sup>C-NMR (100 MHz, DMSO-d<sub>6</sub>) δ (ppm): 163.5, 159.2, 147.7, 143.3, 133.3, 129.4, 127.3, 118.9, 117.0, 114.9, 114.3, 113.6, 112.5, 66.2, 55.0.

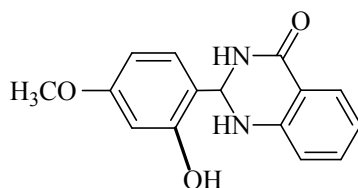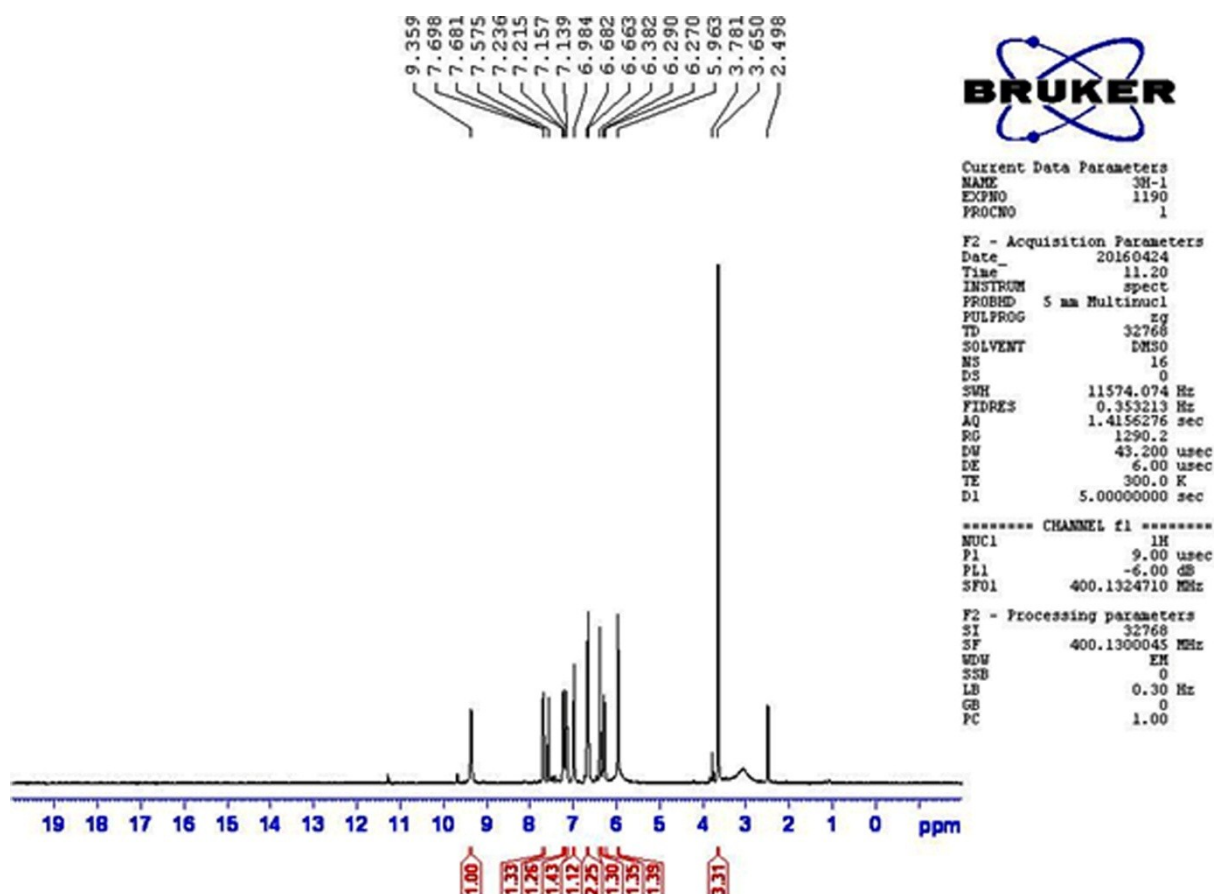

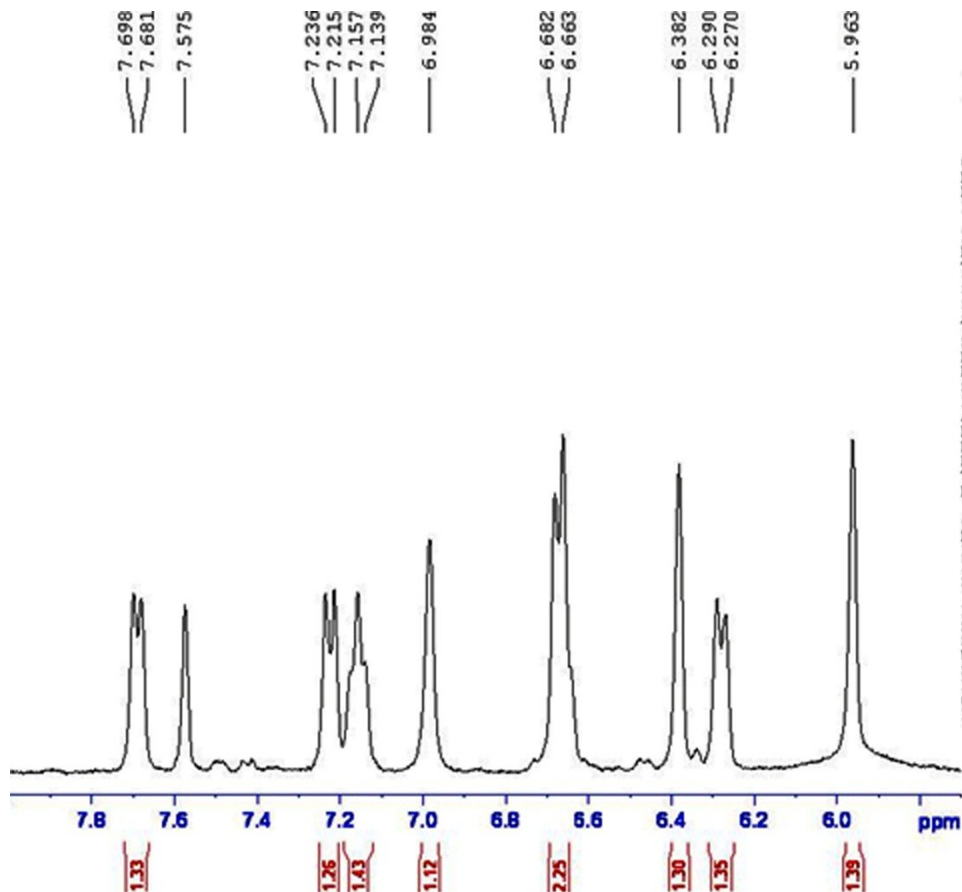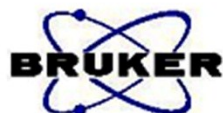

Current Data Parameters  
 NAME 3H-1  
 EXPNO 1190  
 PROCNO 1

F2 - Acquisition Parameters  
 Date\_ 20160424  
 Time 11.20  
 INSTRUM spect  
 PROBE 5 mm Multimacl  
 PULPROG zg  
 TD 32768  
 SOLVENT DMSO  
 NS 16  
 DS 0  
 SWH 11574.074 Hz  
 FIDRES 0.353213 Hz  
 AQ 1.4156276 sec  
 RG 1290.2  
 DW 43.200 usec  
 DE 6.00 usec  
 TE 300.0 K  
 D1 5.00000000 sec

----- CHANNEL f1 -----  
 NUC1 1H  
 P1 9.00 usec  
 PL1 -6.00 dB  
 SF01 400.1324710 MHz

F2 - Processing parameters  
 SI 32768  
 SF 400.1300045 MHz  
 WDW EM  
 SSB 0  
 LB 0.30 Hz  
 GB 0  
 PC 1.00

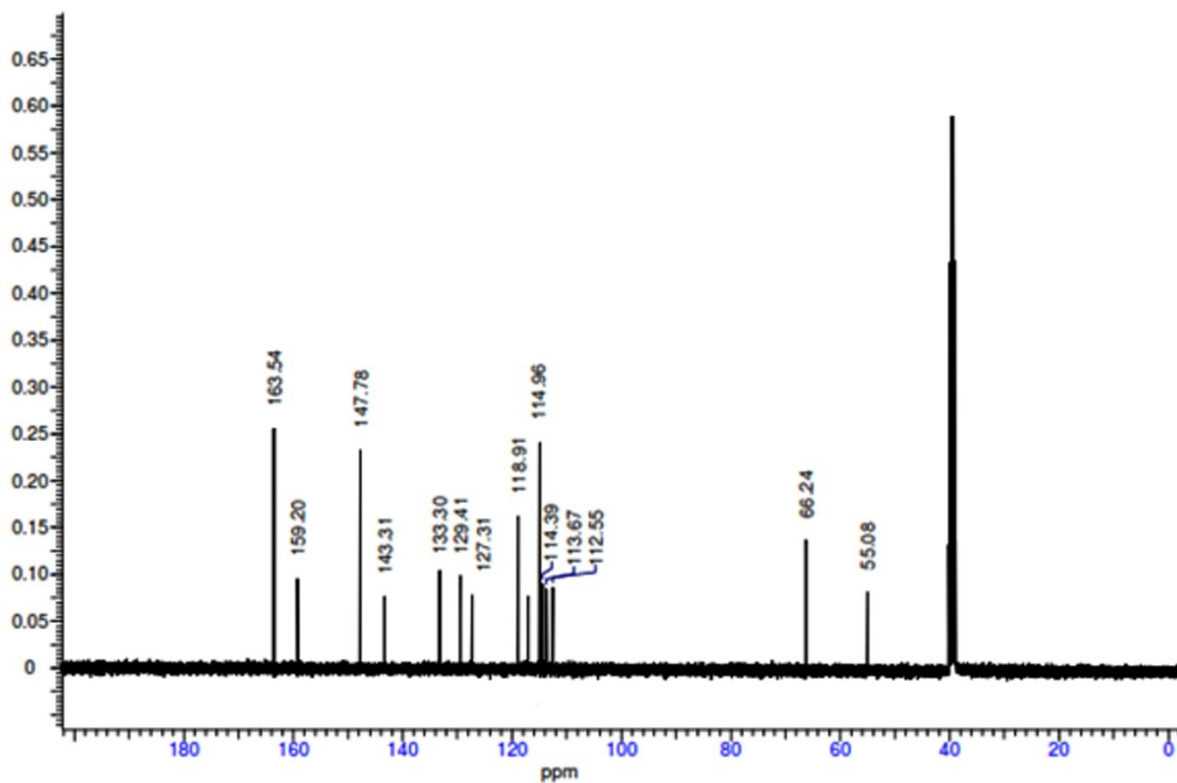

**2-(3-Nitrophenyl)-2,3-dihydroquinazolin-4(1H)-one (table 4, entry 7):** Mp: 180-182 °C [67];  $^1\text{H-NMR}$  (400 MHz, DMSO- $d_6$ ):  $\delta$  (ppm): 8.25 (s, 1H), 8.09 (d,  $J = 7.2$ , 1H), 7.89 (d,  $J = 6.4$ , 1H), 7.83-7.80 (m, 1H), 7.70-7.63 (m, 2H), 7.30 (t,  $J = 7.2$ , 1H), 7.04 (s, 1H), 6.80-6.72 (m, 2H), 6.36 (s, 1H);  $^{13}\text{C-NMR}$  (100 MHz, DMSO- $d_6$ )  $\delta$  (ppm): 163.2, 149.3, 147.4, 147.2, 133.5, 128.0, 127.3, 123.5, 117.4, 114.8, 114.5, 65.2.

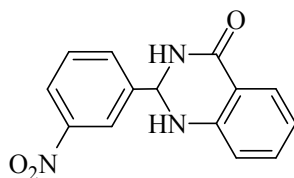

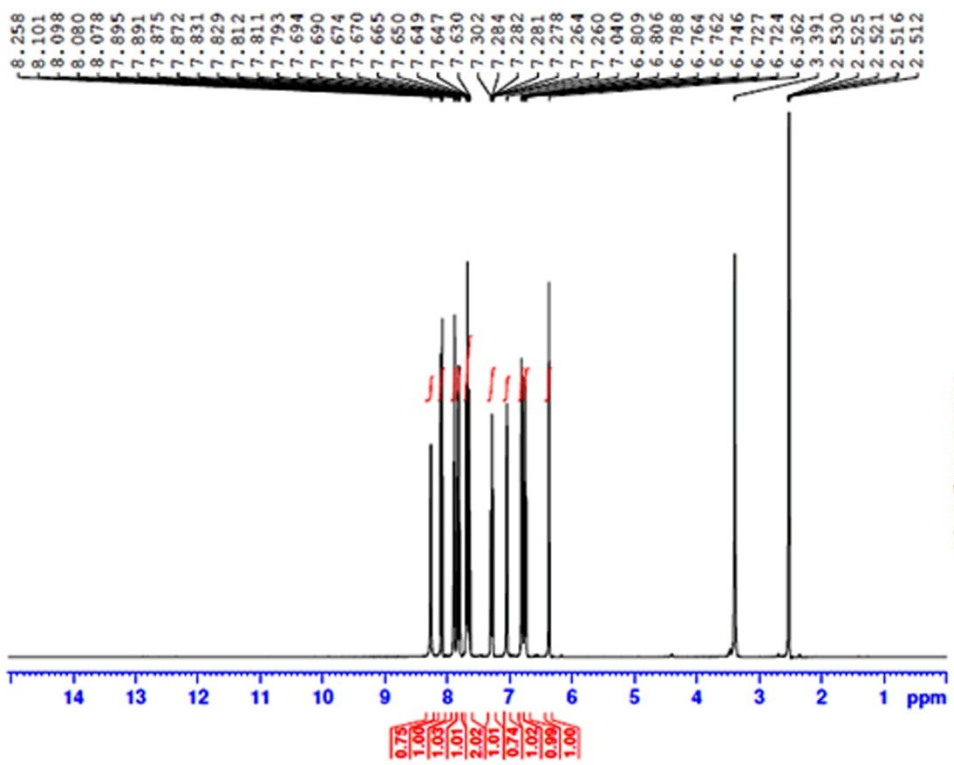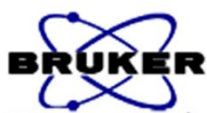

EXPNO 862  
 PROCNO 1  
 Date\_ 20140615  
 Time 7.50  
 INSTRUM spect  
 PROBHD 5 mm PARBO BB-  
 PULPROG zg30  
 TD 65536  
 SOLVENT DMSO  
 NS 20  
 DS 0  
 SSW 8012.820 Hz  
 FIDRES 0.122266 Hz  
 AQ 4.0894966 sec  
 RG 128  
 DW 62.400 usec  
 DE 6.50 usec  
 TE 293.0 K  
 D1 4.00000000 sec  
 TDO 1  
 ----- CHANNEL f1 -----  
 NUC1 1H  
 P1 14.00 usec  
 PL1 -2.00 dB  
 PL1W 11.86359406 W  
 SFO1 400.2236020 MHz  
 SI 32768  
 SF 400.2200000 MHz  
 MW EM  
 SSB 0  
 LB 0.30 Hz  
 GB 0  
 PC 1.00

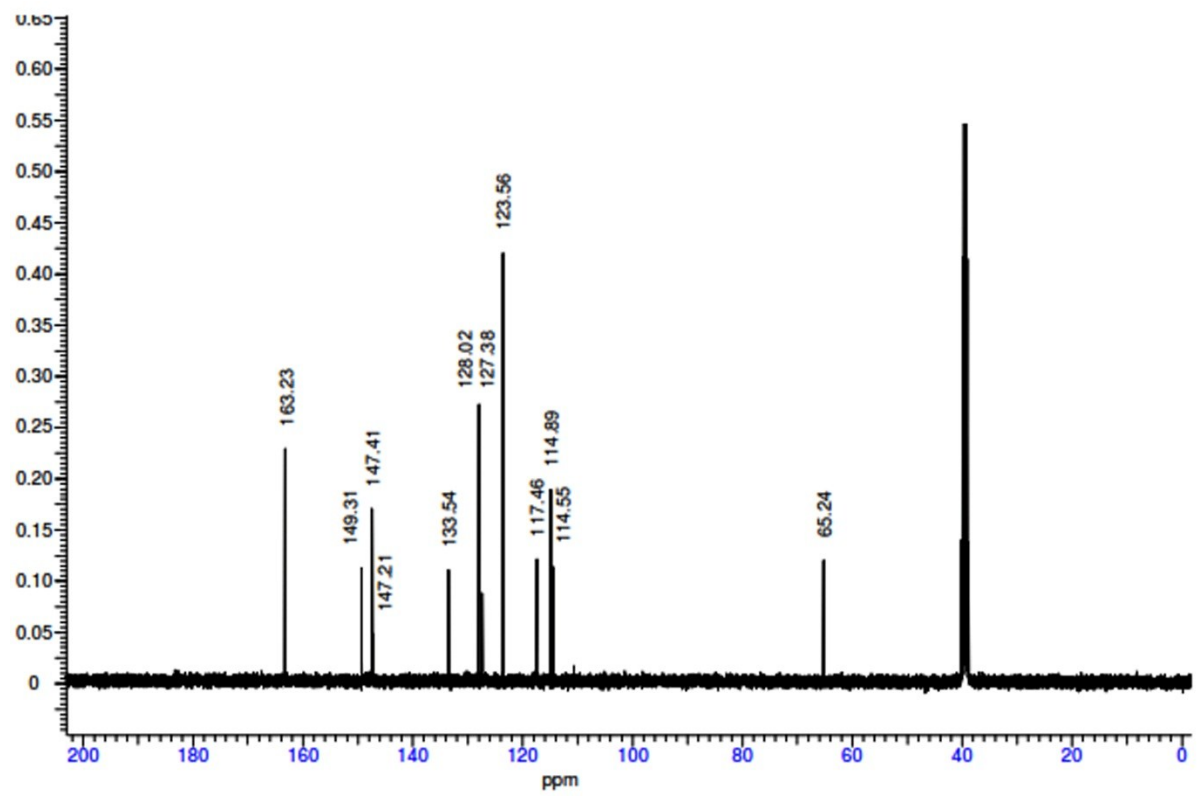

**2-(4-Methoxyphenyl)-2,3-dihydroquinazolin-4(1H)-one**(table 4, entry 9): Mp:182-183 °C [68]; <sup>1</sup>H-NMR (400 MHz, DMSO-d6): δ (ppm):8.20 (s, 1H), 7.64-7.62 (d, *J*= 6, 1H), 7.28-7.24 (t, *J*= 6, 1H), 7.15 (d, *J*= 1.6, 1H), 7.04-6.97 (m, 2H), 6.95 (s, 1H), 6.78-6.76 (d, *J*= 8, 2H), 5.71 (s, 1H), 3.77 (s, 3H); <sup>13</sup>C-NMR (100 MHz, DMSO-d6) δ (ppm):163.6, 159.4, 147.9, 133.4, 133.2, 128.1, 127.3, 117.0, 114.9, 114.3, 113.6, 66.2, 55.1.

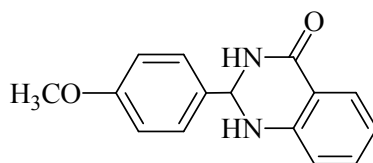

8.205  
7.641  
7.637  
7.622  
7.618  
7.284  
7.282  
7.280  
7.265  
7.263  
7.246  
7.243  
7.242  
7.149  
7.145  
7.037  
7.027  
7.022  
7.006  
7.001  
6.972  
6.951  
6.781  
6.761  
6.719  
6.716  
6.713  
6.697  
6.682  
6.679  
6.676  
5.711  
3.770  
3.760  
3.372  
3.349  
2.530  
2.525  
2.521

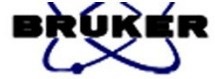

```

EXPNO      864
PROCNO     1
Date_      20140615
Time       8.00
INSTRUM    spect
PROBHD     5 mm PARDO BB-
PULPROG    zg30
TD          65536
SOLVENT    DMSO
NS          20
DS          0
SWH         8012.820 Hz
FIDRES     0.122266 Hz
AQ          4.0894966 sec
RG          161
DW          62.400 usec
DE          6.50 usec
TE          295.0 K
D1          4.00000000 sec
TDO         1

===== CHANNEL f1 =====
NUC1       1H
P1         14.00 usec
PL1        -2.00 dB
PL1W       11.86359406 W
SFO1       400.2236020 MHz
SI         32768
SF         400.2200000 MHz
WDW        EM
SSB         0
LB          0.30 Hz
GB          0
PC          1.00
  
```

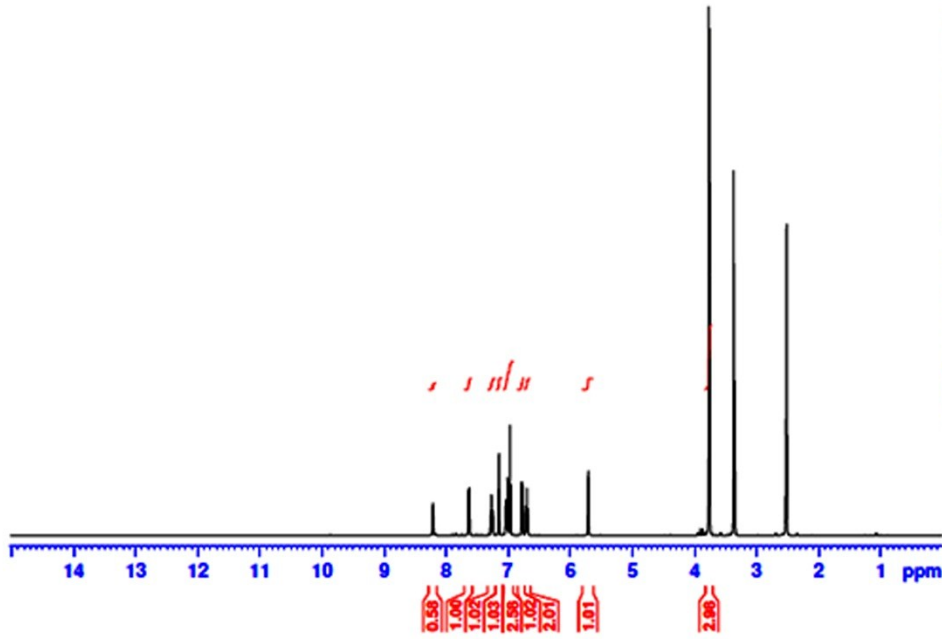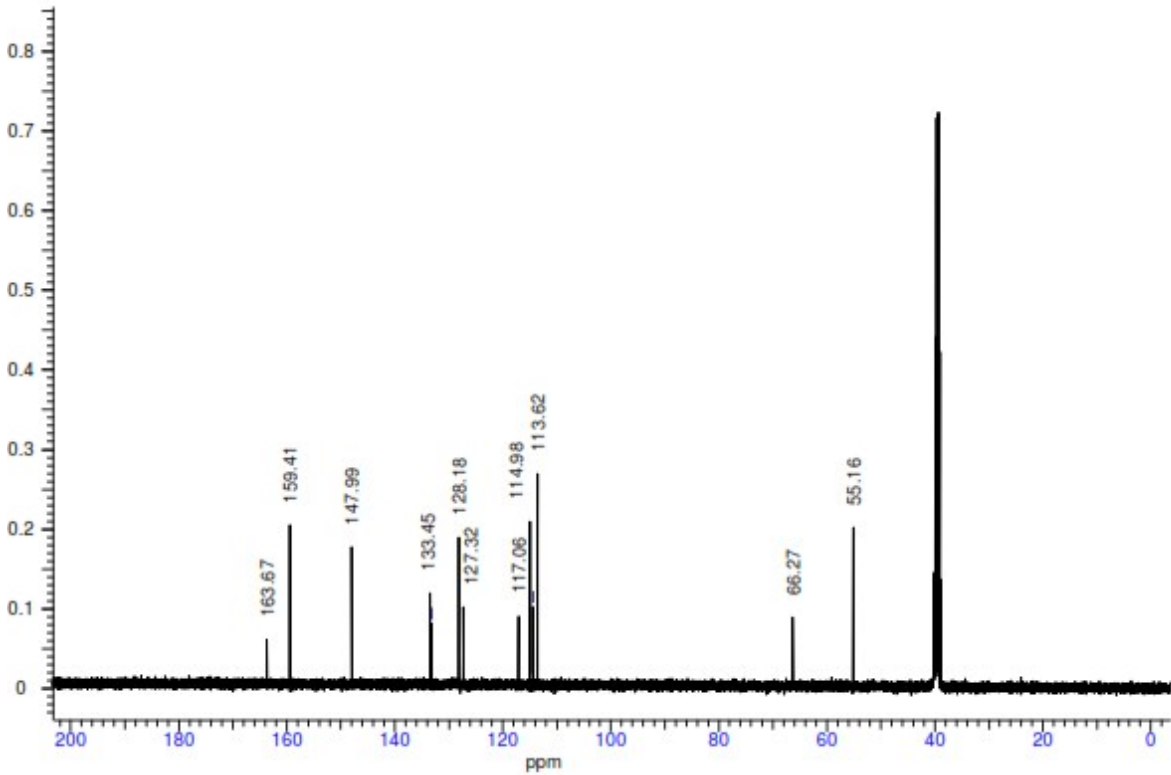



**2-(4-Methylphenyl)-2,3-dihydroquinazolin-4(1*H*)-one** (table 4, entry 10): Mp: 225-226 °C [35]; <sup>1</sup>H-NMR (400 MHz, DMSO-d<sub>6</sub>): δ (ppm): 8.22 (s, 1H), 7.62 (dd, *J* = 8.0 Hz, *J* = 1.3 Hz, 1H), 7.38 (d, *J* = 7.8 Hz, 2H), 7.25-7.21 (m, 1H), 7.20 (d, *J* = 7.8 Hz, 2H), 7.04 (s, 1H), 6.74 (d, *J* = 8.0 Hz, 1H), 6.68-6.64 (m, 1H), 5.71 (s, 1H), 2.29 (s, 3H); <sup>13</sup>C-NMR (100 MHz, DMSO-d<sub>6</sub>) δ (ppm): 164.1, 148.4, 139.1, 138.2, 133.7, 129.3, 127.8, 127.2, 117.5, 115.4, 114.9, 66.8, 21.2.

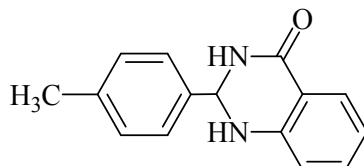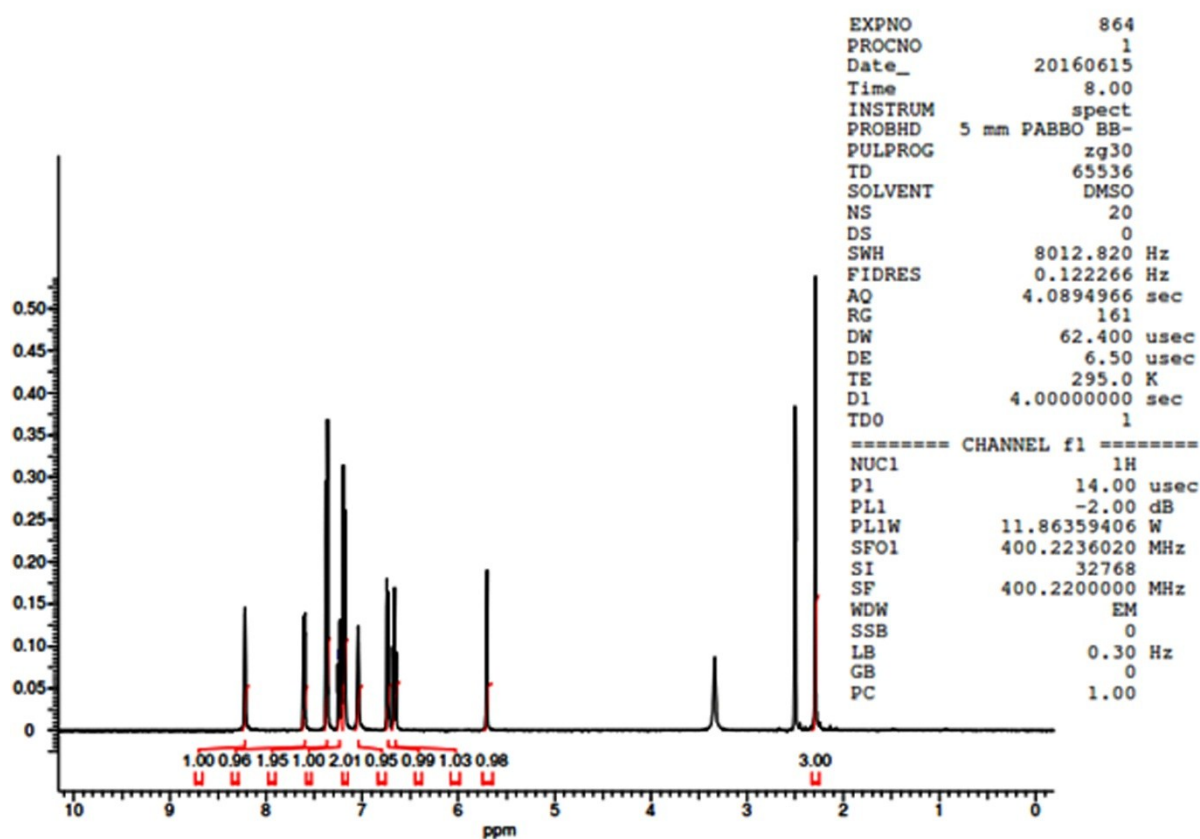

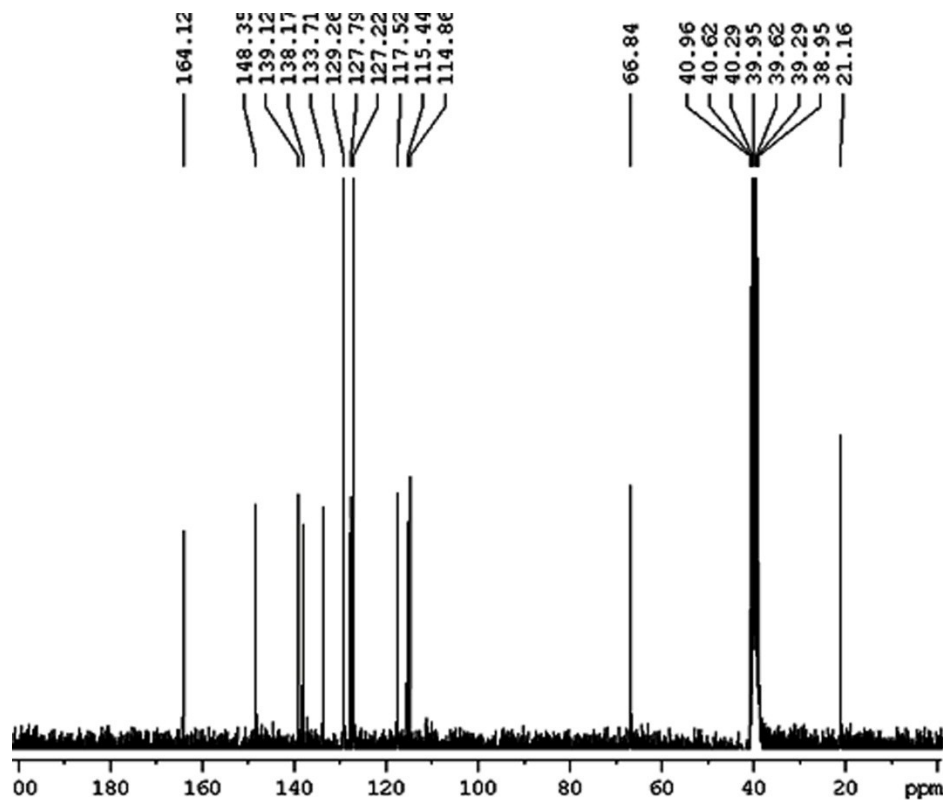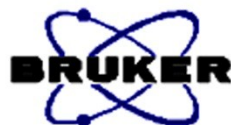

Current Data Parameters

EXFNO 79  
PROCNO 1

F2 - Acquisition Parameters

Date 20160121  
Time 18.18  
INSTRUM spect  
PROBHD 5 mm QNP 1H/13  
PULPROG zgpg30  
TD 65536  
SOLVENT DMSO  
NS 126  
DS 0  
SWH 15060.241 Hz  
FIDRES 0.229801 Hz  
AQ 2.1758451 sec  
RG 2580.3  
DW 33.200 usec  
DE 6.00 usec  
TE 300.0 K  
D1 5.0000000 sec  
d11 0.0300000 sec  
d12 0.0000200 sec

----- CHANNEL f1 -----

NUC1 13C  
P1 8.00 usec  
PL1 0.00 dB  
SFO1 62.9015280 MHz

----- CHANNEL f2 -----

CPDPRG2 waltz16  
NUC2 1H  
PCPD2 80.00 usec  
PL2 3.00 dB  
PL12 20.00 dB  
PL13 20.00 dB  
SFO2 400.1310005 MHz

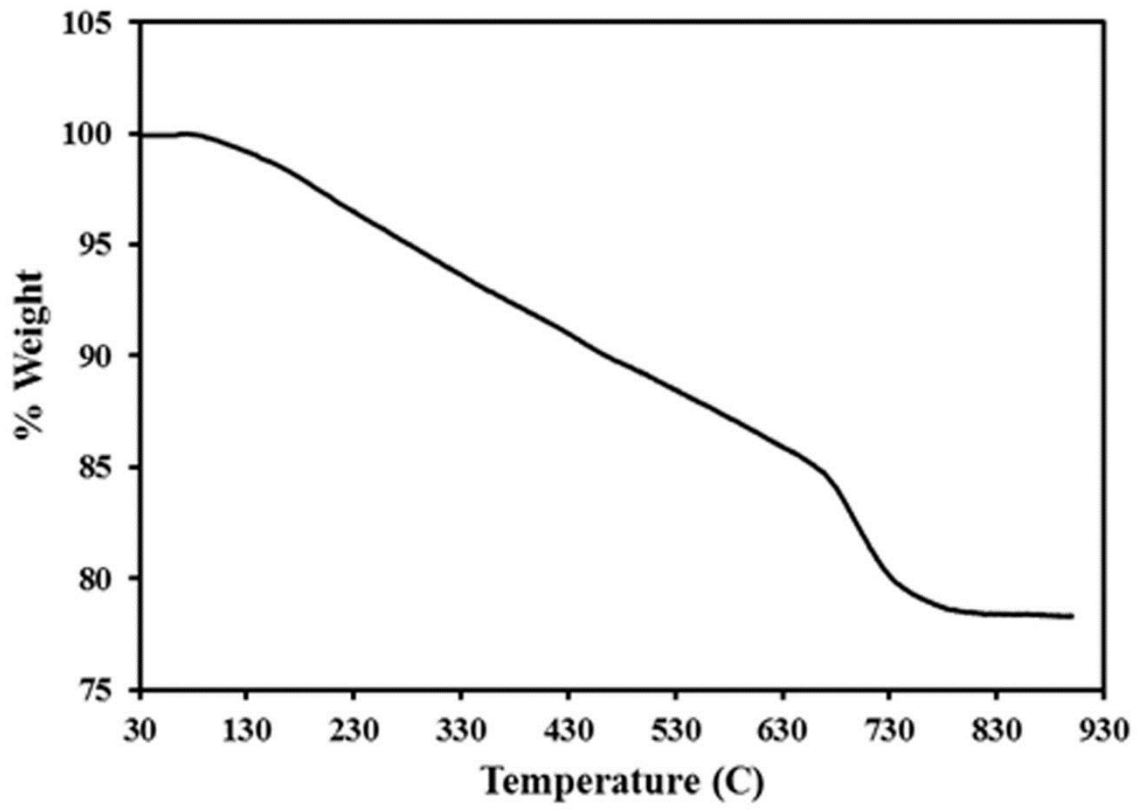

Fig. S1 TG analysis of Graphene Oxide.

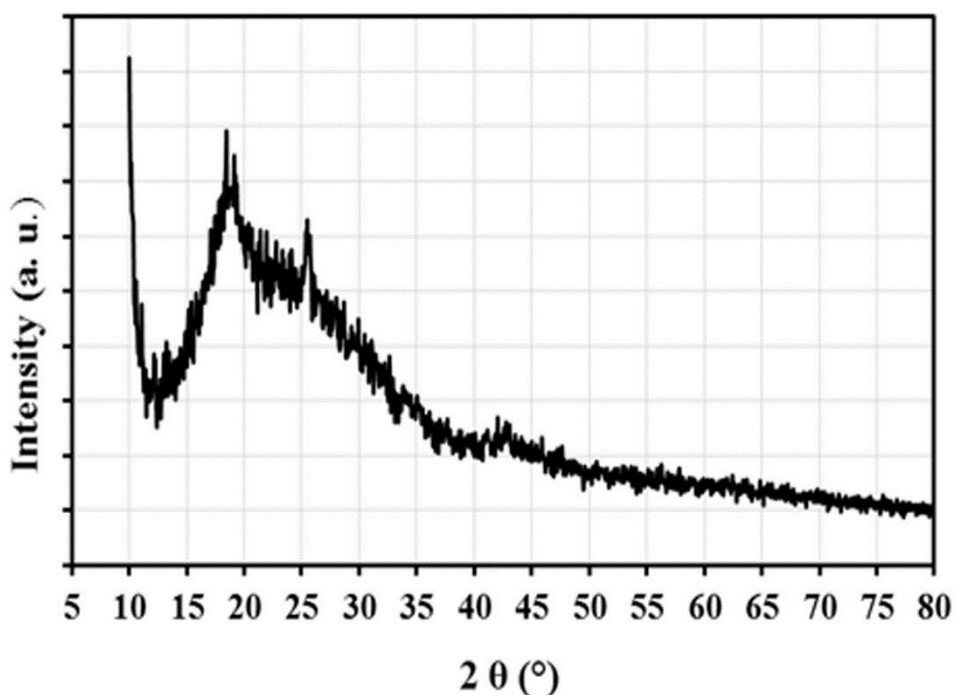

Fig. S2 XRD analysis of Graphene Oxide.

The common methods such as titration with Hammett indicators, temperature programmed desorption of adsorbed molecules such as ammonia or pyridine, adsorption microcalorimetry, NMR spectroscopy have been employed to describe the acidity of POMs in the solid state both qualitatively and quantitatively [43]. Potentiometric titration with n-butylamine let us to estimate the number of acid sites and their distribution [22]. The titration curves show that HybPOM and Go/Fe<sub>3</sub>O<sub>4</sub>/HybPOM with the initial electrode potential -165.9 and -73.8 mV are classified as very weak and weak acid, respectively. Difference in the acid strength of HybPOM and Go/Fe<sub>3</sub>O<sub>4</sub>/HybPOM is attributed to the total number of free NH<sub>2</sub> groups on them. For Go/Fe<sub>3</sub>O<sub>4</sub>/ HybPOM some of NH<sub>2</sub> groups are involved in the bonding with Go/Fe<sub>3</sub>O<sub>4</sub> nanoparticle."

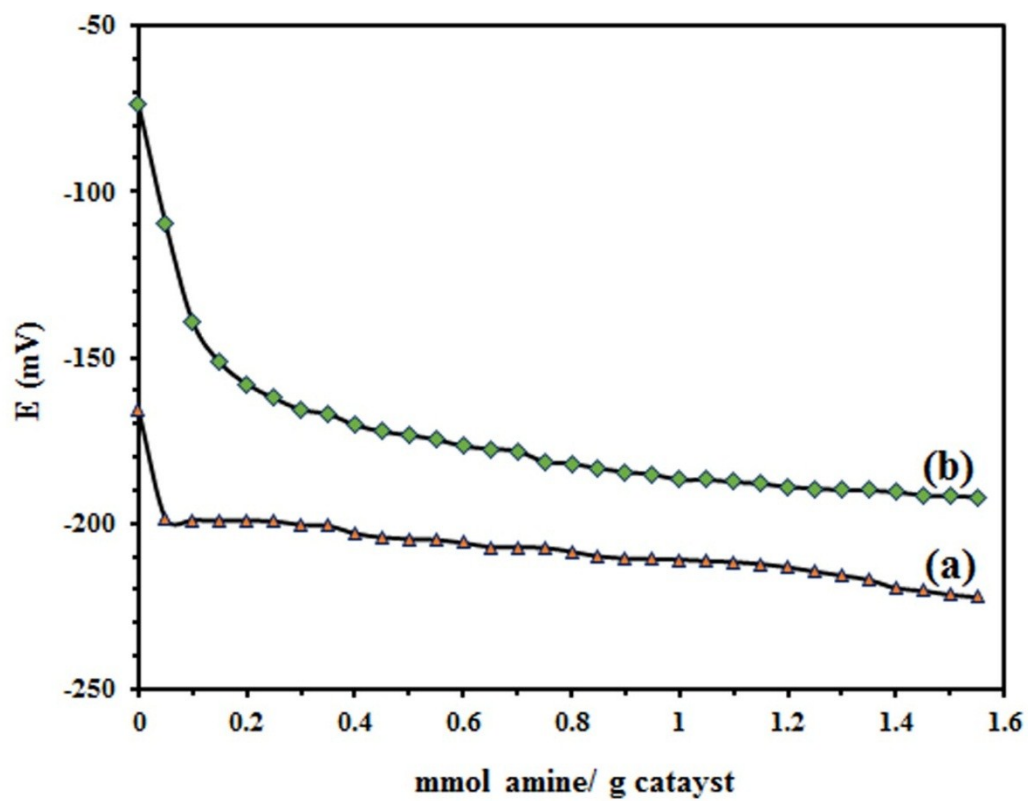

Fig. S3 The acid-base titration curves of HybPOM (a) and Go/Fe<sub>3</sub>O<sub>4</sub>/HybPOM (b)
